# Supplementary material for: Microwave-irradiated rapid synthesis of antimicrobial pyrazine derivatives in reactive eutectic media
Source: Royal Society of Chemistry journal article supplement (doi:10.1039/d2gc03122a), 2022-01-01
Supplement: d2gc03122a1.pdf [file d2gc03122a1.pdf]

## Supporting information

### 1) Educts in molar ratio as well as in weight percent

Table S1: Each sample was prepared with a constant amount of ammonium formate and fructose, with a molar ratio of 1.5:1. Water was added in changing amounts as shown below.

| Ammonium formate [g] | Fructose [g] | Water [g] | Molar ratio of water | Wt% water |
|----------------------|--------------|-----------|----------------------|-----------|
| 0.47                 | 0.90         | 0.00      | :0                   | 0.0       |
| 0.47                 | 0.90         | 0.09      | :1                   | 6.2       |
| 0.47                 | 0.90         | 0.27      | :3                   | 16.4      |
| 0.47                 | 0.90         | 0.45      | :5                   | 24.7      |
| 0.47                 | 0.90         | 0.63      | :7                   | 31.5      |
| 0.47                 | 0.90         | 0.90      | :10                  | 39.6      |
| 0.47                 | 0.90         | 1.80      | :20                  | 56.7      |
| 0.47                 | 0.90         | 4.50      | :50                  | 76.6      |
| 0.47                 | 0.90         | 9.01      | :100                 | 86.8      |

Table S2: For comparison, educts for the synthesis of DOF from previous papers, which were discussed in the introduction.

| Reference                      | Reactants                    |                        |                         | Molar ratio      | Wt% water |
|--------------------------------|------------------------------|------------------------|-------------------------|------------------|-----------|
| Wu <sup>20</sup>               | <i>Ammonium formate [g]</i>  | <i>Fructose [g]</i>    | <i>Water [g]</i>        | <b>10:1:179</b>  | 95.2      |
|                                | 0.39                         | 0.1                    | 2                       |                  |           |
| Shanxi Institute <sup>21</sup> | <i>Ammonium chloride [g]</i> | <i>Fructose [g]</i>    | <i>Water [g]</i>        | <b>10:1:1000</b> | 96.2      |
|                                | 15                           | 5                      | 500                     |                  |           |
| Jia <sup>22</sup>              |                              | <i>Glucosamine [g]</i> | <i>Ionic liquid [g]</i> | <b>1:100</b>     | 90.9      |
|                                |                              | 0.2                    | 2                       |                  |           |

## 2) Quantitative H-NMR

Pyrazine was used as an internal standard and was added to the NMR solvent in the range of 1.5 g/ml. The amount of product was calculated, based on the following equation:

$$m(x) = m(std) \cdot \frac{mw(x)}{mw(std)} \cdot \frac{nH(std)}{nH(x)} \cdot \frac{A(x)}{A(std)}$$

Where  $m(x)$  and  $m(std)$  are the weights in g,  $mw(x)$  and  $mw(std)$  are the molecular weights in g/mol,  $A(x)$  and  $A(std)$  are the integration areas of the selected peaks of the product and the internal standard

DOF content was quantified based on their aromatic proton peaks, shown below for the example of fructose. Fructose and fucose were measured in  $D_2O$ , glucose and rhamnose in  $DMSO-d_6$  to avoid overlap between the pyrazine and product peaks.

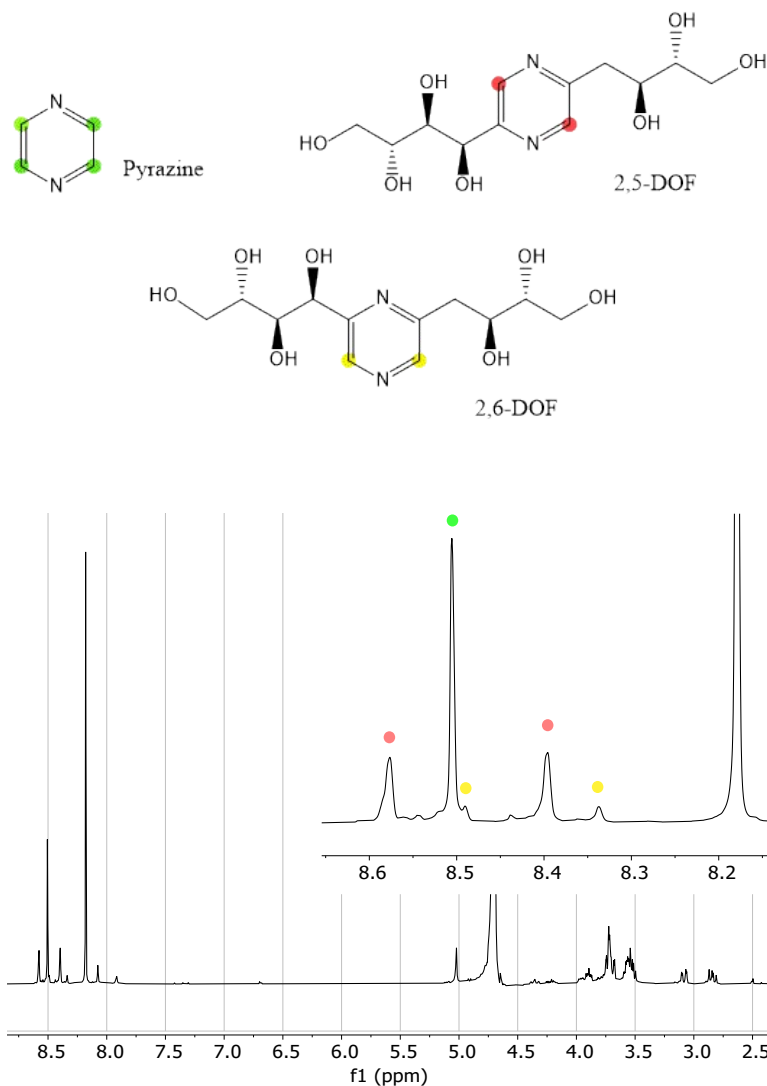

In the case of water as a third component of the reaction mixture the method was applied in exactly the same way. There was no sign of water evaporation during the synthesis, according to pressure monitoring during the reaction. Also the weight of the reaction mixture remained constant before and after synthesis.

### 3) Procedure of high throughput screening

Antimicrobial susceptibility tests were performed via the antiBiotic Mode of Action Profile (BioMAP) assay (1, 2). BioMAP utilizes high-throughput screening methodology in order to screen the effect of compounds on a panel of 19 pathogenic bacterial strains, including both Gram negative and Gram positive strains (Table S3).

The assay was performed according to Clinical & Laboratory Standards (CLSI) protocols, and as per Hawkins et al. (2), with the following exceptions: during compound incubation cation-adjusted Muller Hinton Broth (CAMHB; Millipore-Sigma) was used as the growth media for 12 bacterial strains, a 1:1 mixture of CAMHB and brain heart infusion (BHI; Millipore Sigma); (CAMHB:BHI) was used as the growth media for 3 strains, and 4 strains were grown in appropriate complete media (Table S3).

Briefly, each bacterial strain was inoculated in 3 mL of sterile media, as in Hawkins et al. (2), and grown overnight with shaking (200 rpm) at 37°C, with the exception of *Streptococcus pneumoniae*, which was placed in a 5% CO<sub>2</sub> incubator set to 37°C, overnight, without shaking. Saturated overnight cultures were diluted in the appropriate media (Table S3) to achieve approximately 5 x 10<sup>5</sup> CFU of final inoculum density and dispensed via a Matrix dispenser into sterile clear polystyrene 384-well assay microplates (Greiner 781186, Sigma-Aldrich) with a final screening volume of 30 µL. As per Hawkins et al. (2), solutions of test compounds and antibiotic controls were prepared as a 1:1 dilution series in 384-well storage microplates (NUNC 264573, Thermo Fisher Scientific). Two hundred nanoliters of the compound, or antibiotic control, was pinned into each assay plate using a Tecan Freedom EVO 100 equipped with a 384 well pintoole. Post-pinning test compounds had a final concentration ranging from 40 to 4 mM per compound, while antibiotic controls had a final concentration ranging from 128 µM to 3.91 nM per compound.

In each 384-well plate, controls were placed in lanes 1, 2, 23 and 24. For the controls, lane 1 contained vehicle (DMSO) and culture medium only; lane 2 contained vehicle (DMSO), culture medium and target bacteria; and lanes 23 and 24 contained vehicle (DMSO), culture medium, target bacteria and antibiotic controls. Ciprofloxacin and gentamicin were used as controls for Gram negative bacteria, while azithromycin and vancomycin were used as controls for Gram positive bacteria.

After pinning and dispensing, absorbance values were obtained at OD600 for timepoint T<sub>0</sub> using an automated plate reader (Synergy Neo2, BioTek). Plates were then sealed with a lid and placed in a 37°C incubator. *S. pneumoniae* was incubated in a separate incubator (37°C; 5% CO<sub>2</sub>). After an incubation period of 18-20 hours absorbance measurements were obtained for timepoint T<sub>20</sub>.

MIC90 values were calculated using GRAPHPAD PRISM (version 8). Percent growth (PG) was calculated via the following equation

$$PG = [(Treat_{T_{20}} - Treat_{T_0}) / (C_{pos} - C_{neg})] \times 100$$

Where, Treat represents absorbance values at T<sub>0</sub> and T<sub>20</sub>; Cneg and Cpos are the averaged absorbance values of the controls in Lane 1 (DMSO + culture media) and lane 2 (DMSO + culture media + bacteria), respectively. Percent inhibition was calculated as 100 – PG.

Table S3. Information related to bacterial strains used in BioMAP assay.

| Strain Name                                             | Strain Designation | Growth Media |
|---------------------------------------------------------|--------------------|--------------|
| <b>Gram-Positive</b>                                    |                    |              |
| <i>Bacillus subtilis</i>                                | ATCC 6051          | CAMHB        |
| <i>Enterococcus faecalis</i>                            | ATCC 29212         | CAMHB:BHI    |
| <i>Enterococcus faecium</i>                             | ATCC 6569          | CAMHB:BHI    |
| <i>Listeria ivanovii</i>                                | BAA-139            | TSB          |
| <i>Staphylococcus aureus</i><br>(Methicillin-Resistant) | BAA-44             | CAMHB        |
| <i>Staphylococcus aureus</i><br>(Methicillin-Sensitive) | ATCC 29213         | CAMHB        |
| <i>Staphylococcus epidermidis</i>                       | ATCC 14990         | TSB          |
| <i>Streptococcus pneumoniae</i>                         | ATCC 49619         | CAMHB:BHI    |
| <b>Gram-Negative</b>                                    |                    |              |
| <i>Acinetobacter baumannii</i>                          | ATCC 19606         | CAMHB        |
| <i>Escherichia coli</i>                                 | K-12 MG1655        | CAMHB        |
| <i>Klebsiella aerogenes</i>                             | ATCC 35029         | CAMHB        |
| <i>Klebsiella pneumoniae</i>                            | ATCC 700603        | CAMHB        |
| <i>Ochrobactrum anthropi</i>                            | ATCC 49687         | TSB          |
| <i>Providencia alcalifaciens</i>                        | ATCC 9886          | CAMHB        |
| <i>Pseudomonas aeruginosa</i>                           | ATCC 27853         | CAMHB        |
| <i>Salmonella enterica</i>                              | ATCC 13311         | CAMHB        |
| <i>Shigella sonnei</i>                                  | ATCC 25931         | CAMHB        |
| <i>Vibrio cholera</i>                                   | A1552 El Tor       | CAMHB        |
| <i>Yersinia pseudotuberculosis</i>                      | ATCC 6904          | BHI          |

#### 4) Characterization of products

Major products are depicted below. The respective isomers (2,5 vs. 2,6) were also detected in smaller amounts. We did not aim to identify any byproducts but the Maillard reaction is also known as the browning reaction and produces a range of heterogeneous polymeric material for prolonged reaction times. The typical products were recognizable by the dark brown color as well as by the pleasant smell of the crude samples.

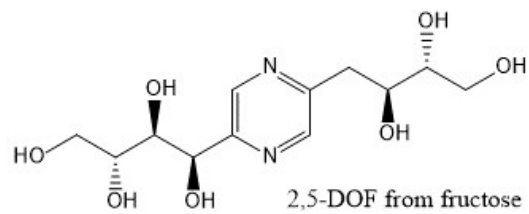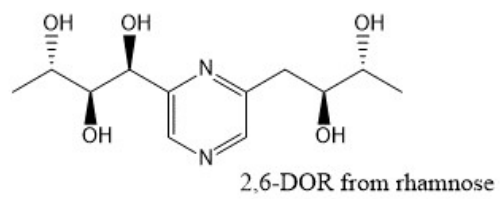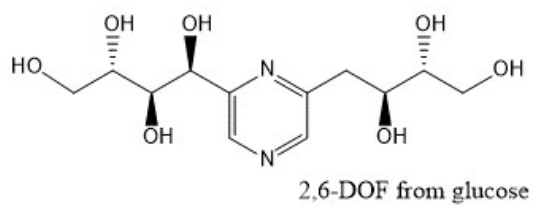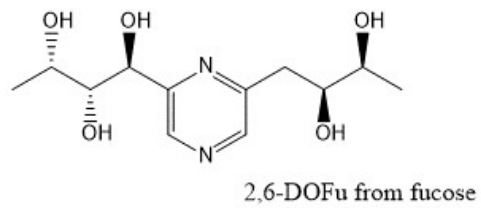

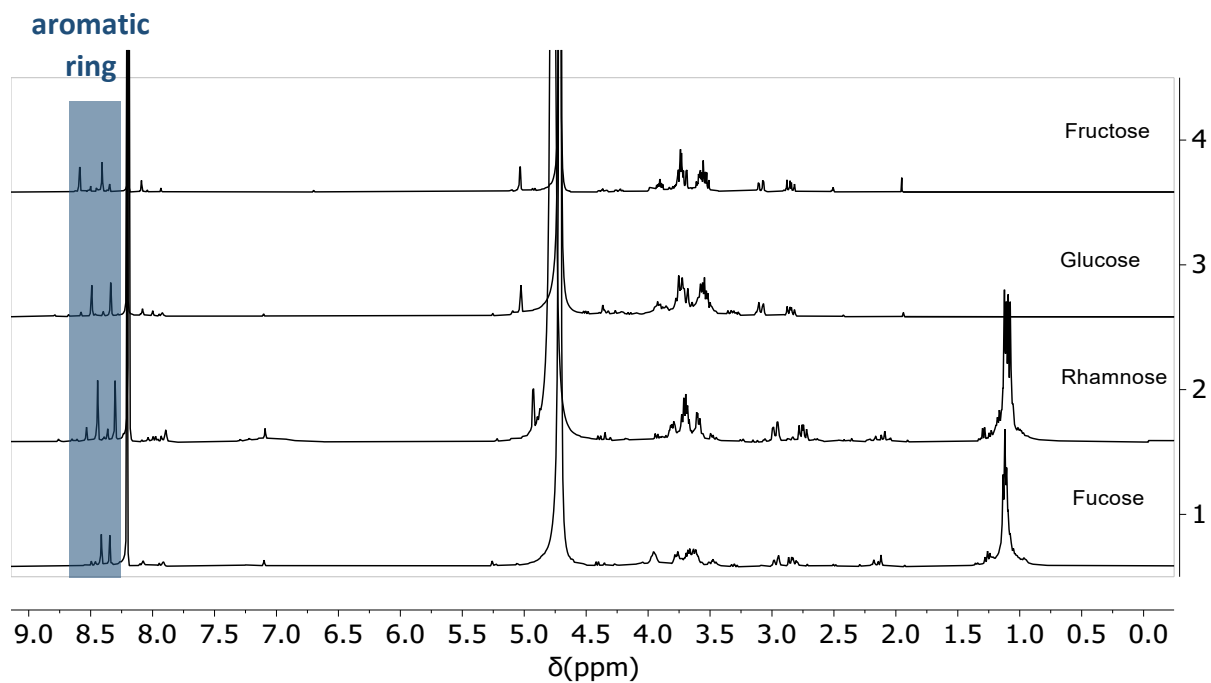

$^1\text{H-NMR}$  in  $\text{D}_2\text{O}$  of the crude reaction mixture from different monosaccharides

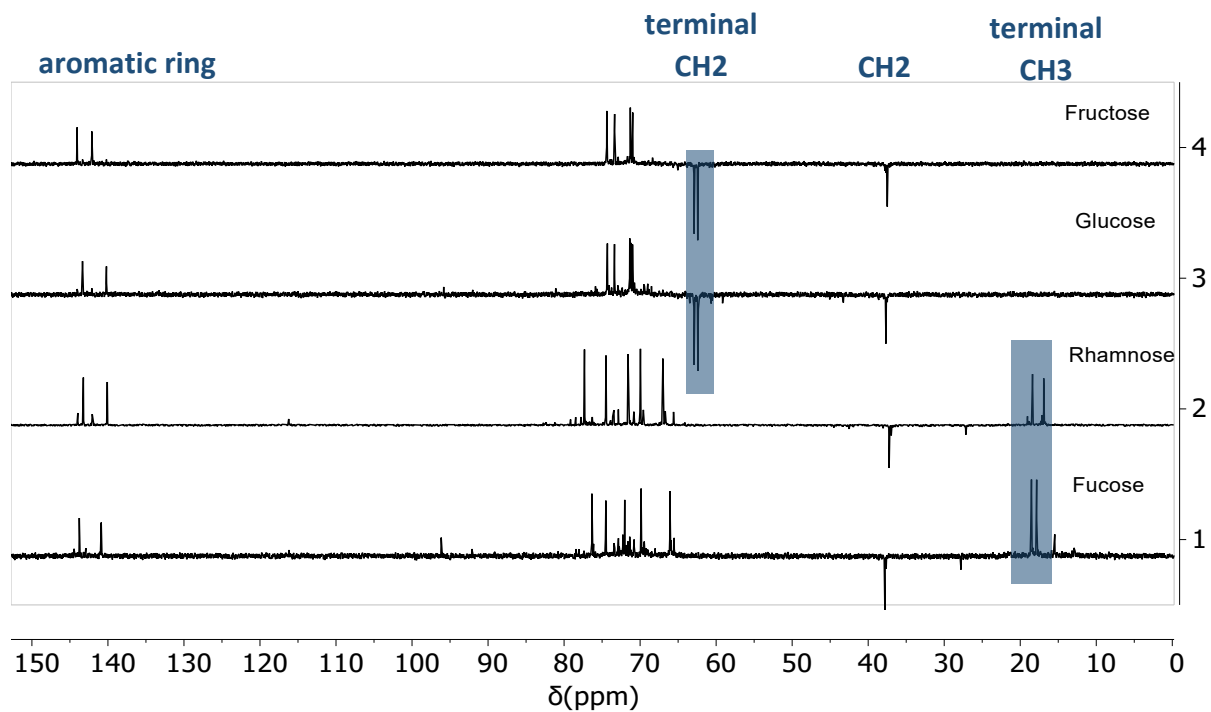

DEPT  $^{13}\text{C-NMR}$  in  $\text{D}_2\text{O}$  of the crude reaction mixture from different monosaccharides

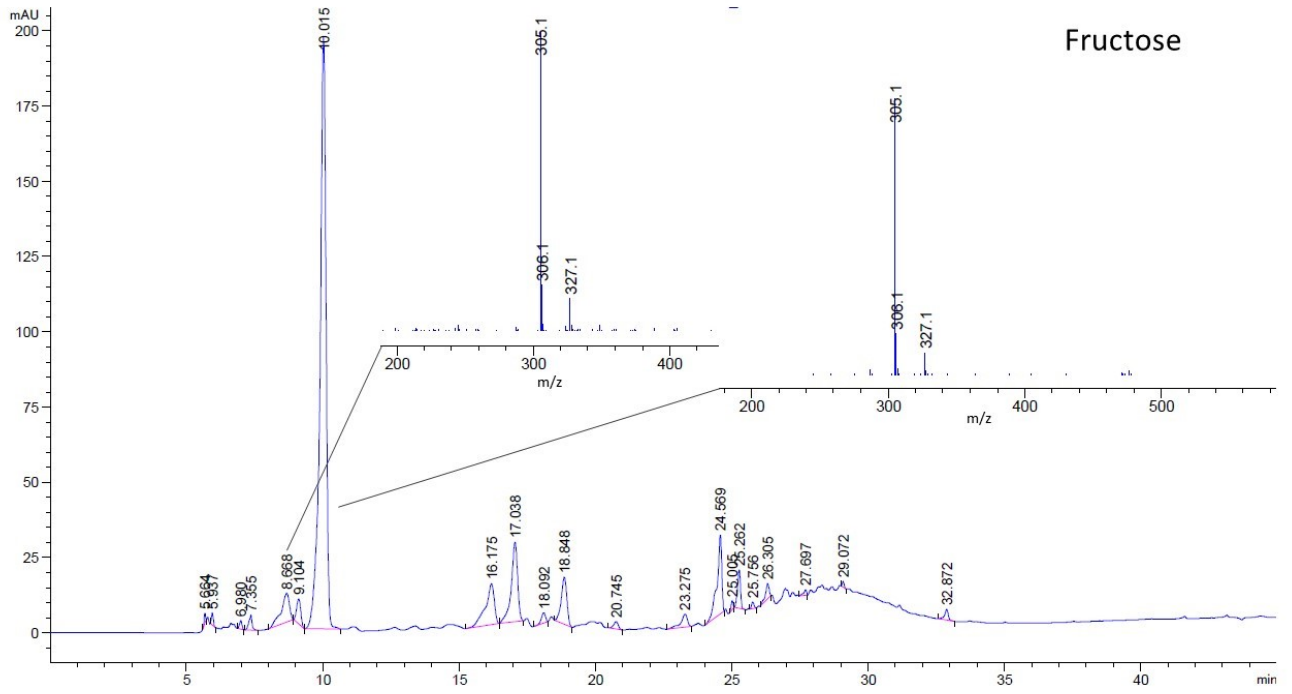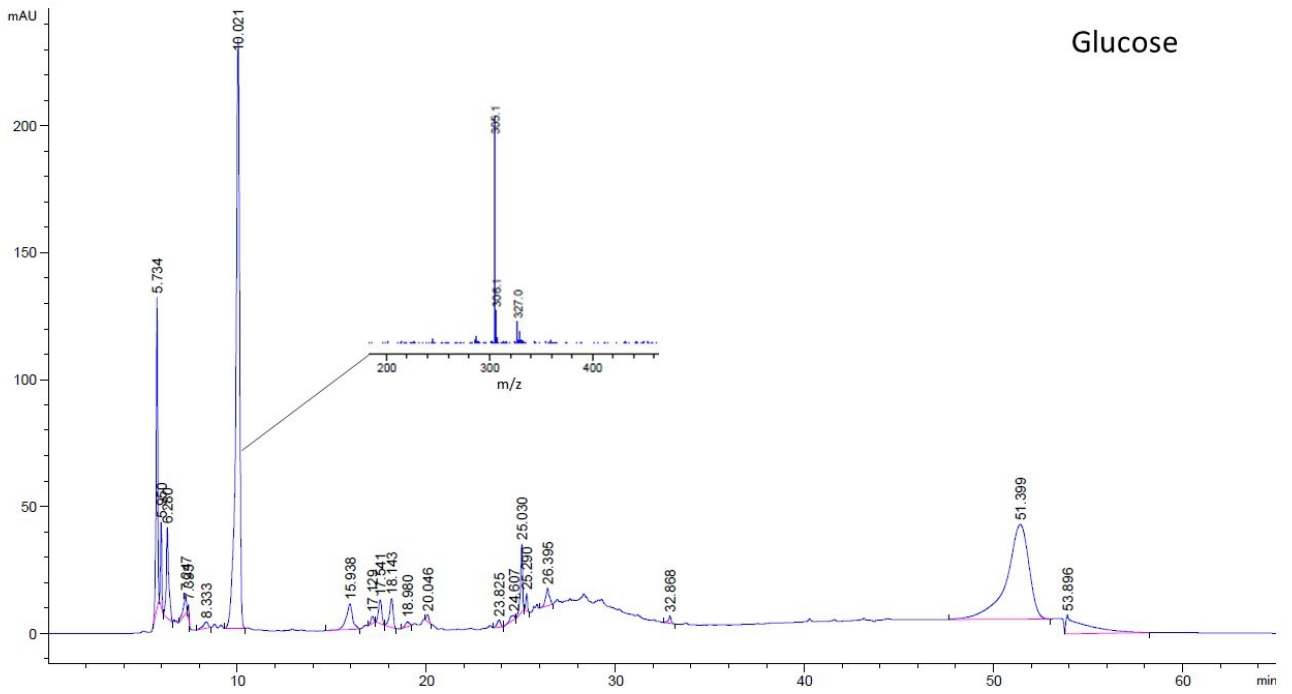

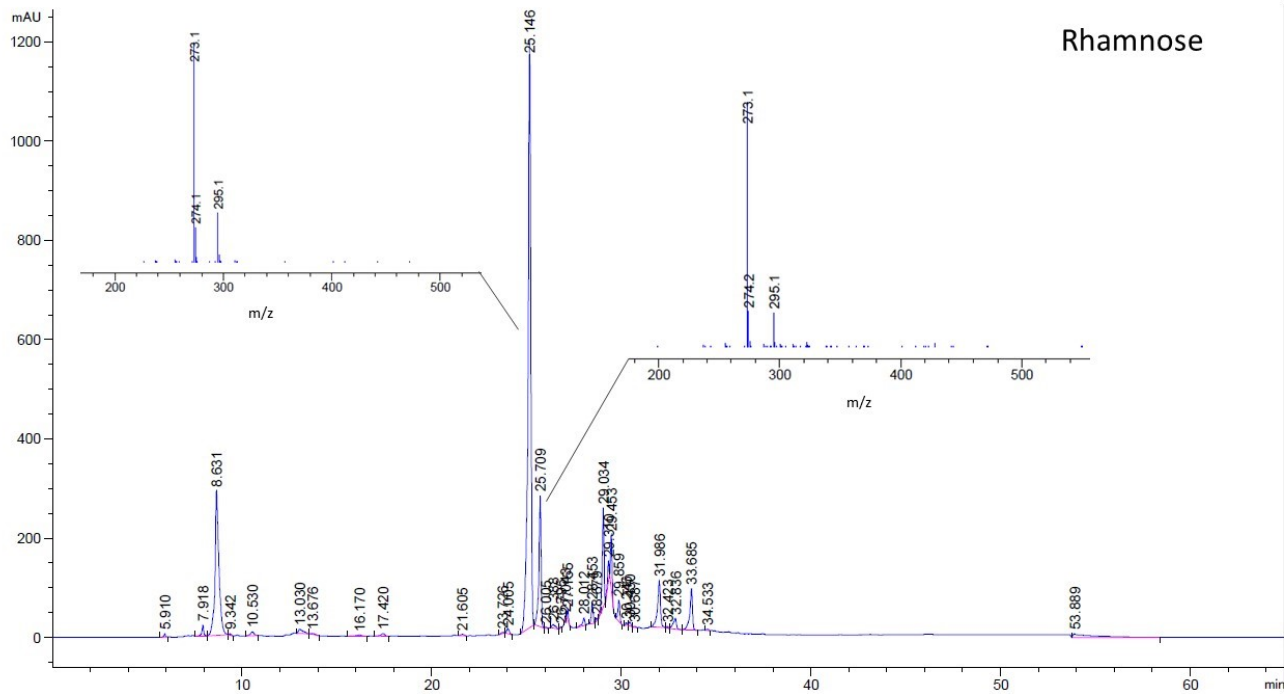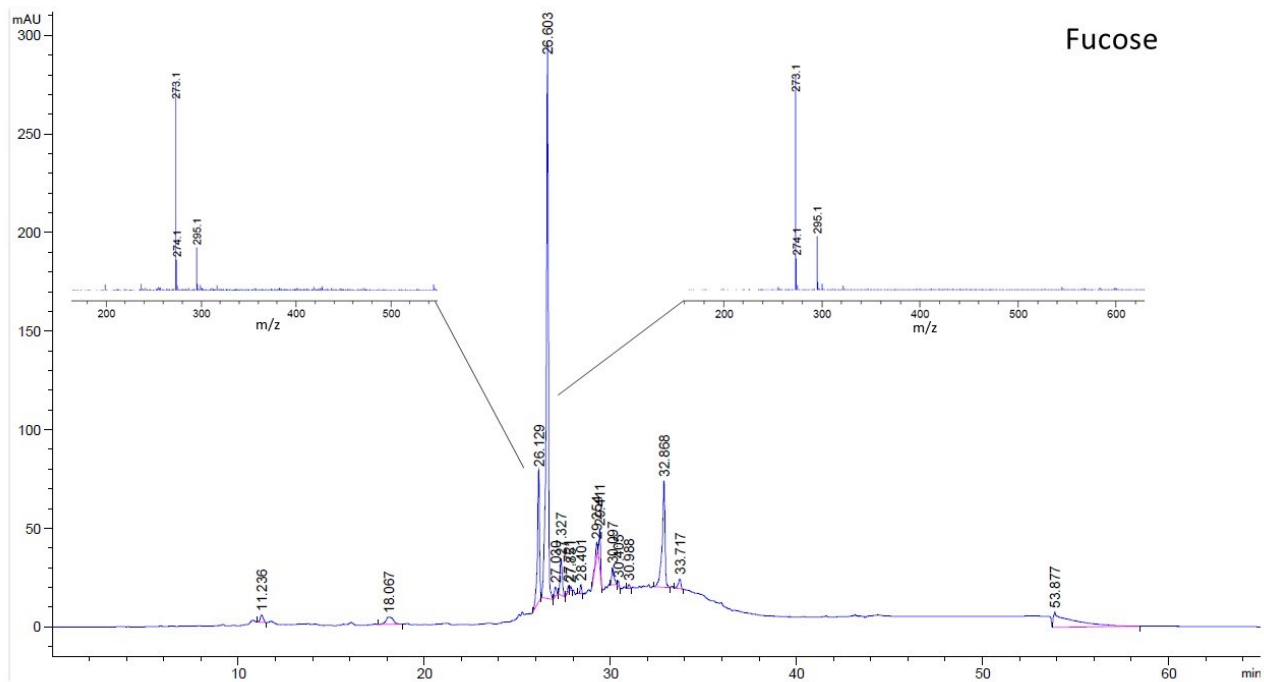

HPLC-MS of the crude reaction mixture from different monosaccharides



5) Characterization of separated DOR derivatives

**Analytical data for 2,6-DOR from Rhamnose**

$^1\text{H}$  NMR (400 MHz,  $\text{DMSO-d}_6$ )  $\delta$  = 8.60 (s, 1H), 8.40 (s, 1H), 5.33 (d,  $J$  = 6.5 Hz, 1H), 5.06 – 4.97 (d looking m, 1H), 4.73 – 4.62 (m, 3H), 4.50 (d,  $J$  = 8.1 Hz, 1H),  $\square$ 3.77 – 3.61 (m, 1H),  $\square$ 3.62 – 3.52 (m, 1H), 3 $\square$ .47 (q,  $J$  = 6.0 Hz, 1H),  $\square$ 3.38 – 3.23 (m, 1H),  $\square$ 3.02 (dd,  $J$  = 13.8, 2.8 Hz, 1H), 2.65  $\square$ 2.68 – 2.60 (dd,  $J$  = 13.8, 9.7 Hz, 1H),  $\square$ 1.14 (d,  $J$  = 6.2 Hz, 3H), 1.11 (d,  $J$  = 6.1 Hz, 3H) ppm.

$^{13}\text{C}$  NMR (101 MHz,  $\text{DMSO-d}_6$ )  $\delta$  = 19.95, 21.15, 39.25, 66.64, 70.39, 71.97, 75.38, 78.37, 141.01, 143.29, 154.38, 158.45 ppm.

HRMS (ESI<sup>+</sup>): Calculated for  $\text{C}_{12}\text{H}_{21}\text{N}_2\text{O}_5$ : 273.1445, Found: 273.1453

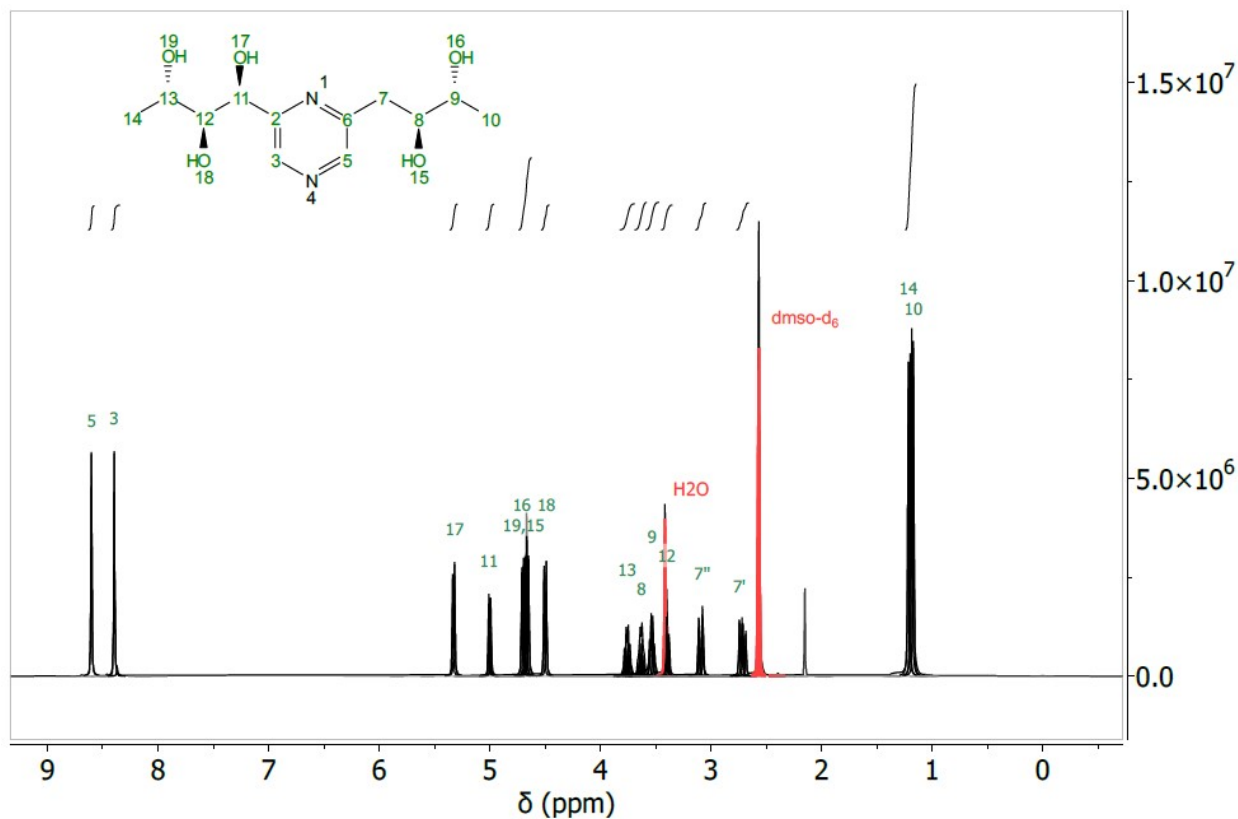

$^1\text{H}$ -NMR (400MHz,  $\text{DMSO-d}_6$ ) for 2,6-DOR from rhamnose

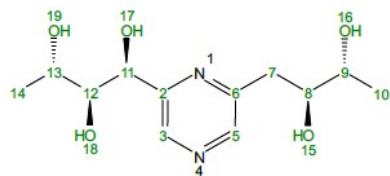

C13-NMR

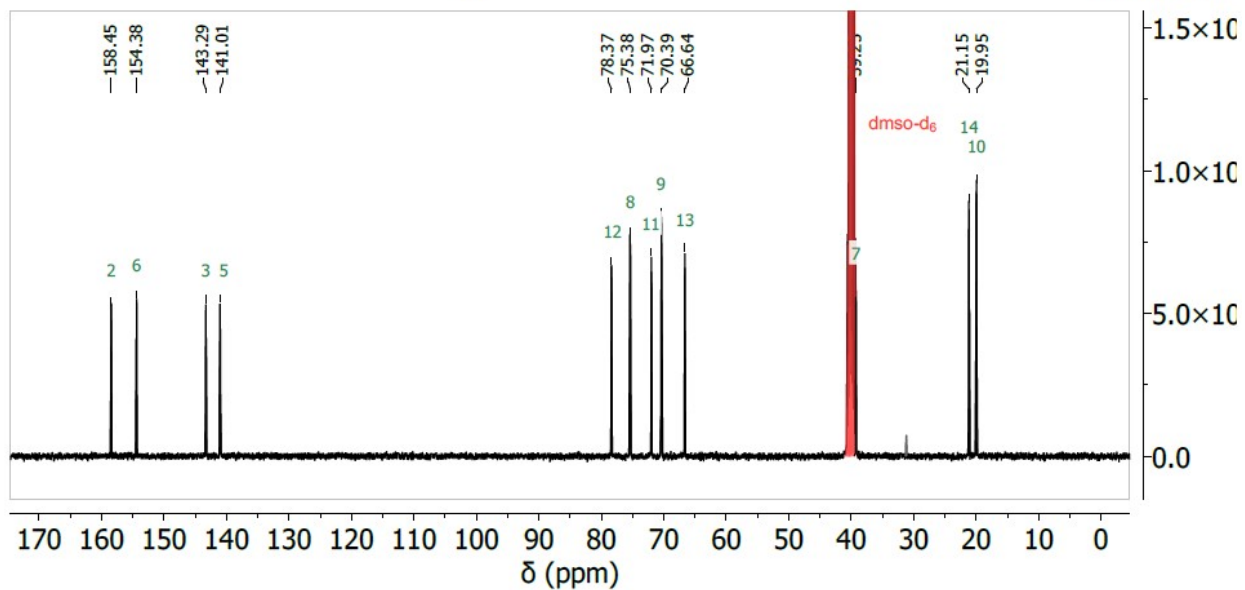

<sup>13</sup>C-NMR (400MHz, DMSO-d<sub>6</sub>) for 2,6-DOR from rhamnose

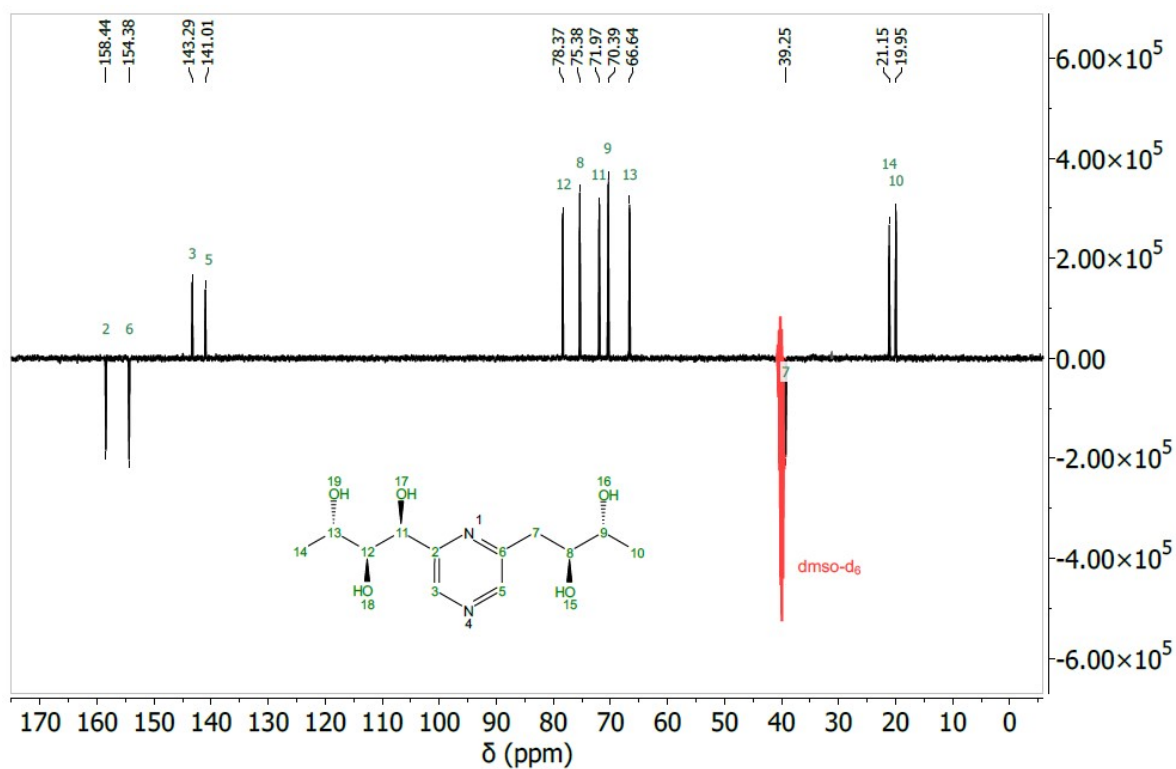

<sup>13</sup>C-APT-NMR (400MHz, DMSO-d<sub>6</sub>) for 2,6-DOR from rhamnose

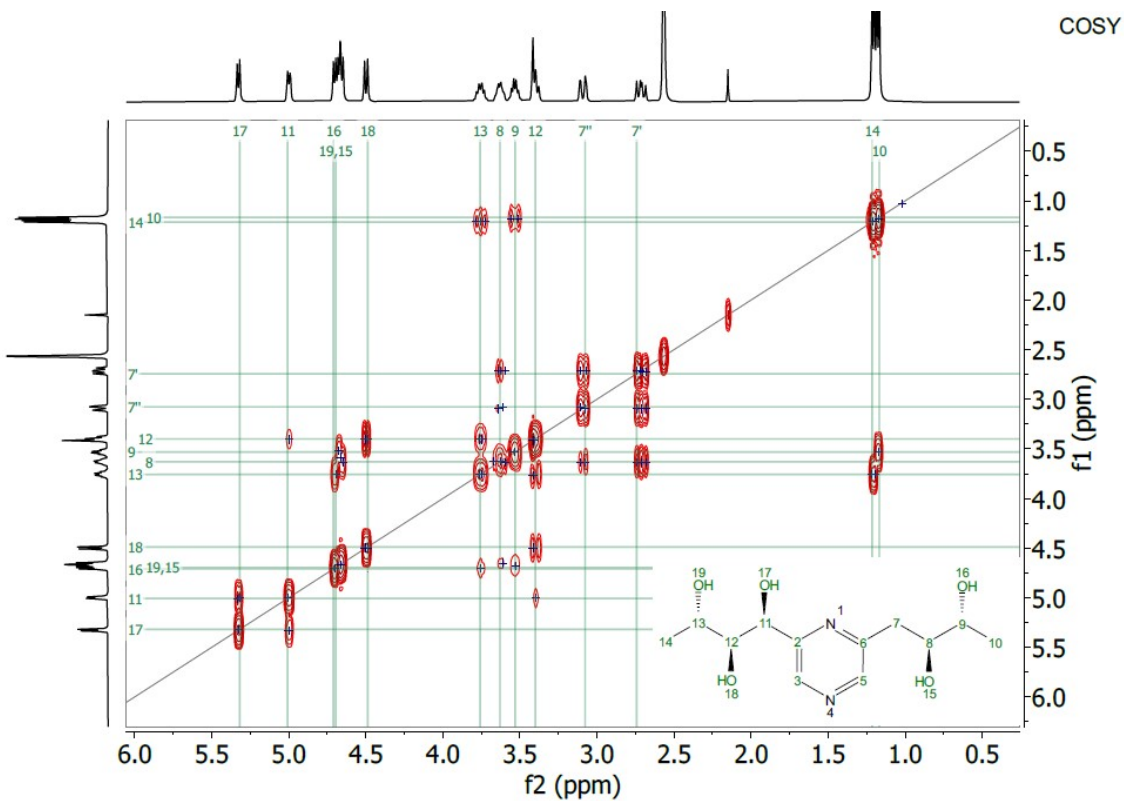

COSY -NMR (400MHz, DMSO-d<sub>6</sub>) for 2,6-DOR from rhamnose

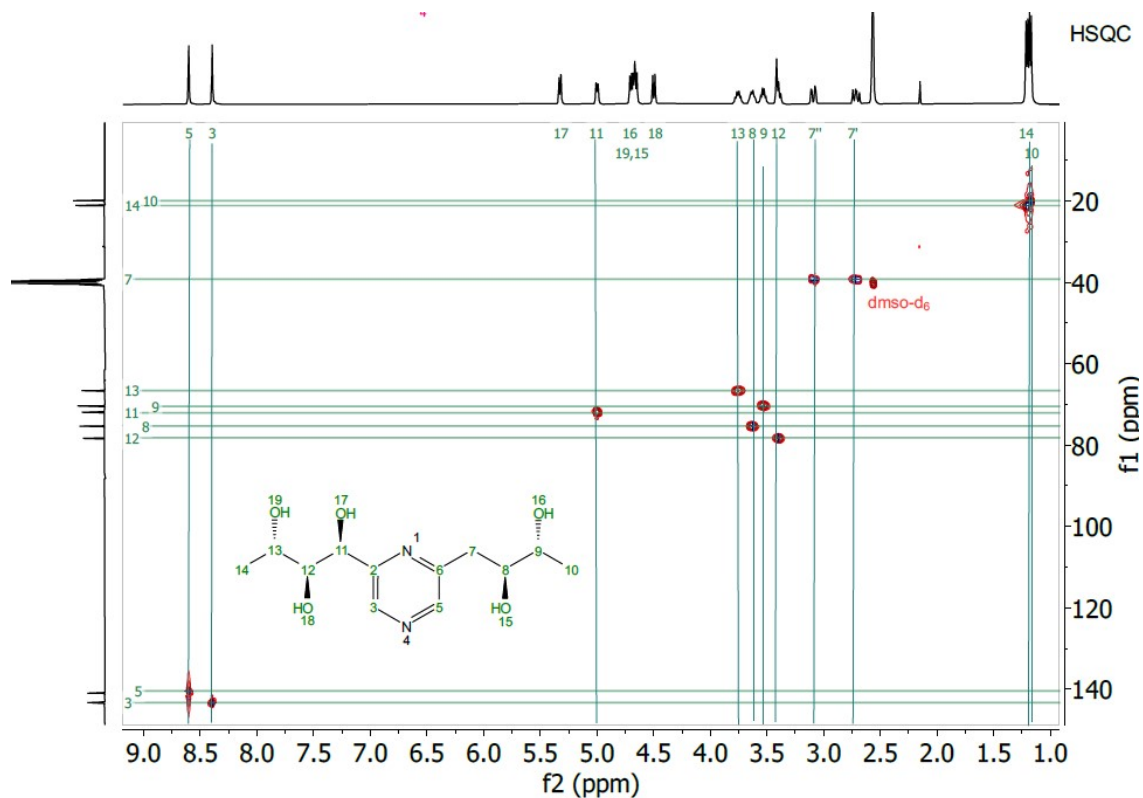

HSQC -NMR (400MHz, DMSO-d<sub>6</sub>) for 2,6-DOR from rhamnose

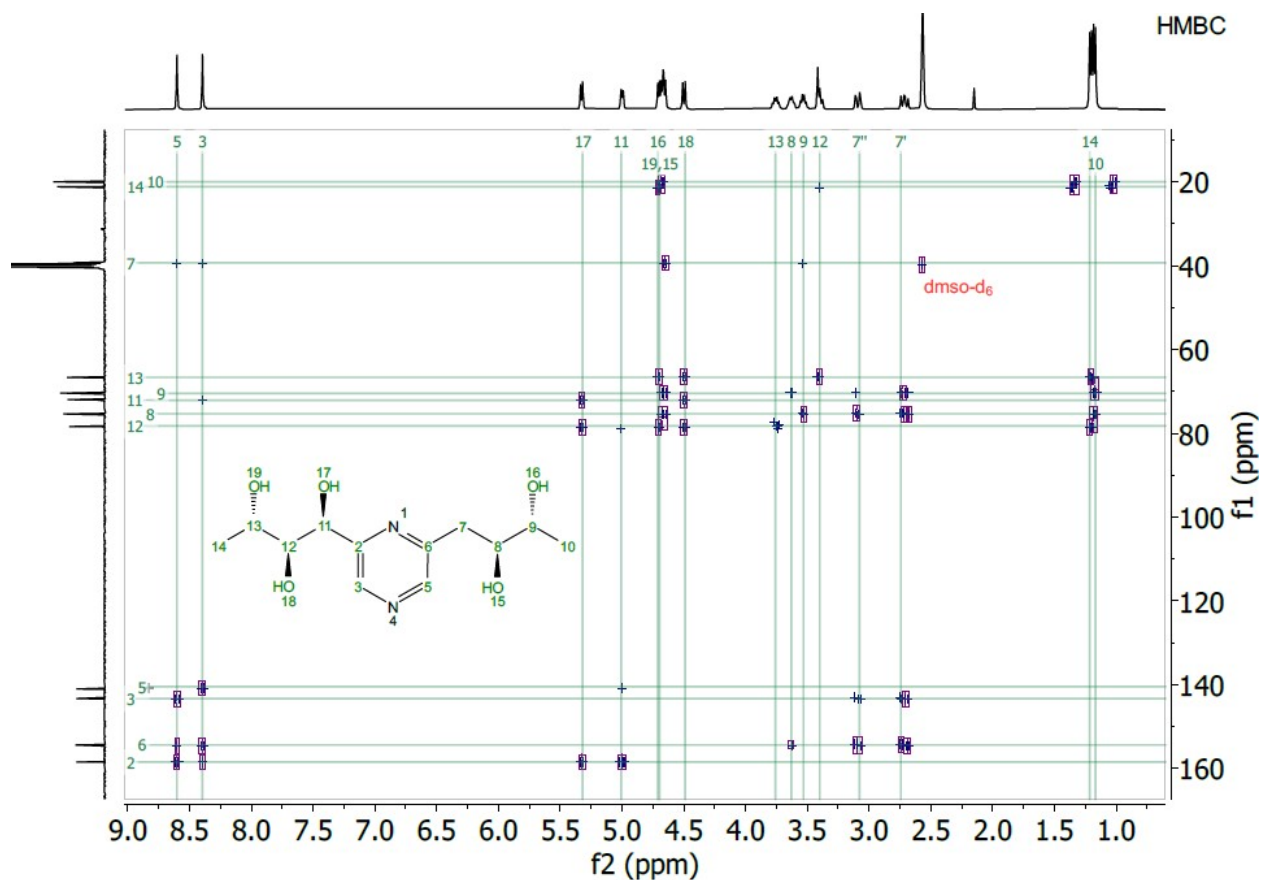

HMBC -NMR (400MHz, DMSO-d<sub>6</sub>)

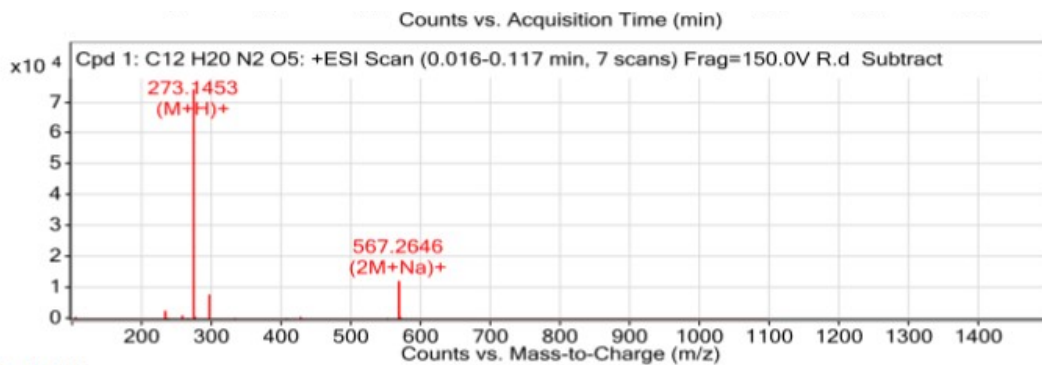

Peak List

| m/z      | z | Abund | Formula           | Ion          |
|----------|---|-------|-------------------|--------------|
| 255.1336 | 1 | 134   | C12 H19 N2 O4     | (M+H)+[-H2O] |
| 273.1453 |   | 75954 | C12 H21 N2 O5     | (M+H)+       |
| 273.3493 |   | 993   |                   |              |
| 274.1483 |   | 7596  | C12 H21 N2 O5     | (M+H)+       |
| 275.15   |   | 925   | C12 H21 N2 O5     | (M+H)+       |
| 295.1273 | 1 | 8129  | C12 H20 N2 Na O5  | (M+Na)+      |
| 296.1307 | 1 | 1059  | C12 H20 N2 Na O5  | (M+Na)+      |
| 567.2646 | 1 | 13067 | C24 H40 N4 Na O10 | (2M+Na)+     |
| 568.2678 | 1 | 3006  | C24 H40 N4 Na O10 | (2M+Na)+     |
| 569.2701 | 1 | 621   | C24 H40 N4 Na O10 | (2M+Na)+     |

HR-MS of for 2,6-DOR from rhamnose

### Analytical data for 2,5-DOF from fructose.

$^1\text{H}$  NMR (400 MHz,  $\text{DMSO-}d_6$ )  $\delta$  = 8.62 (s, 1H), 8.39 (s, 1H), 5.31 (d,  $J$  = 6.4 Hz, 1H), 4.93 (d,  $J$  = 5.9 Hz, 1H), 4.67 (dd,  $J$  = 15.9, 4.7 Hz, 2H), 4.62 (d,  $J$  = 6.6 Hz, 1H), 4.42 (d,  $J$  = 7.0 Hz, 2H), 4.37 (d,  $J$  = 5.9 Hz, 1H), 3.75 (dtd,  $J$  = 9.5, 6.4, 6.3, 2.9 Hz, 1H), 3.69 – 3.52 (m, 5H), 3.44-3.37 (m, 2H, overlapping with  $\text{H}_2\text{O}$  peak in  $\text{DMSO-}d_6$ ), 3.06 (dd,  $J$  = 14.0, 3.0 Hz, 1H), 2.72 (dd,  $J$  = 13.9, 9.5 Hz, 1H) ppm.

$^{13}\text{C}$  NMR (101 MHz,  $\text{DMSO-}d_6$ )  $\delta$  = 38.39, 63.25, 63.62, 71.29, 71.36, 71.40, 73.84, 74.96, 142.30, 143.31, 153.26, 155.77 ppm.

HRMS (ESI<sup>+</sup>): Calculated for  $\text{C}_{12}\text{H}_{21}\text{N}_2\text{O}_7$ : 305.1343, Found: 305.1356.

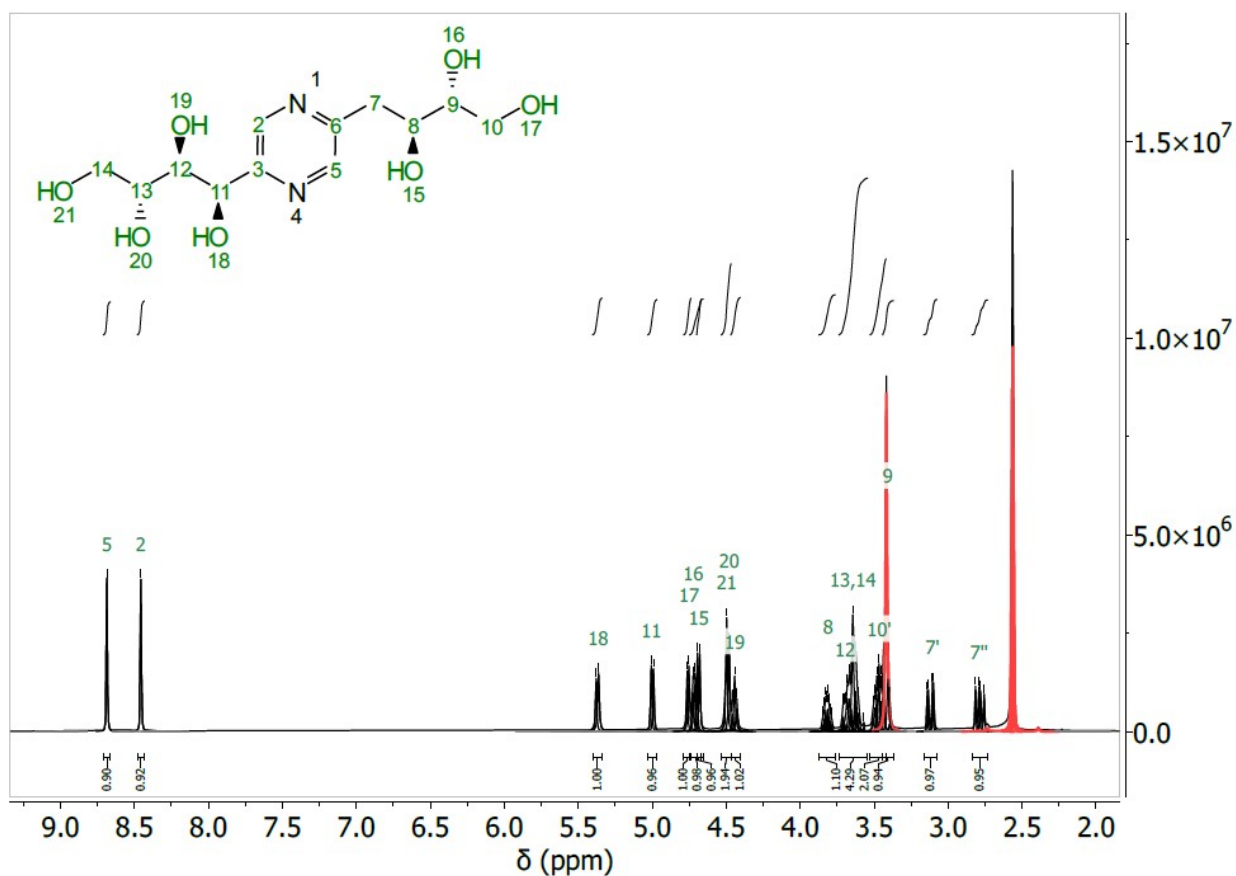

$^1\text{H}$  -NMR (400MHz,  $\text{DMSO-}d_6$ ) for 2,5-DOF from fructose

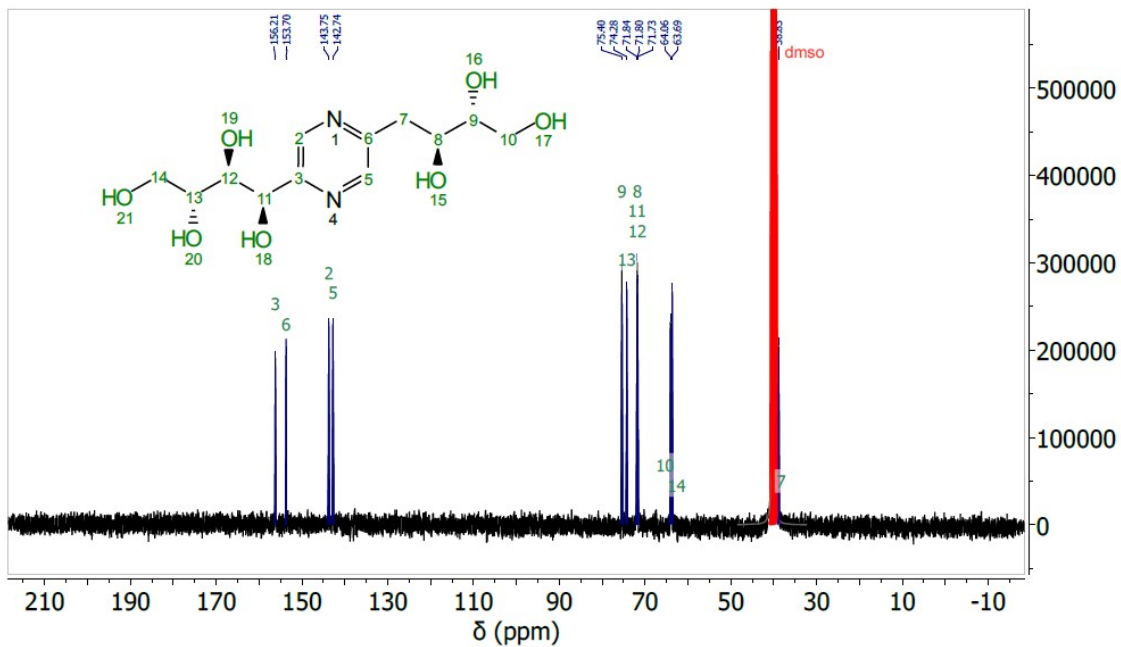

$^{13}\text{C}$ -NMR (400MHz, DMSO- $d_6$ ) for 2,5-DOF from fructose

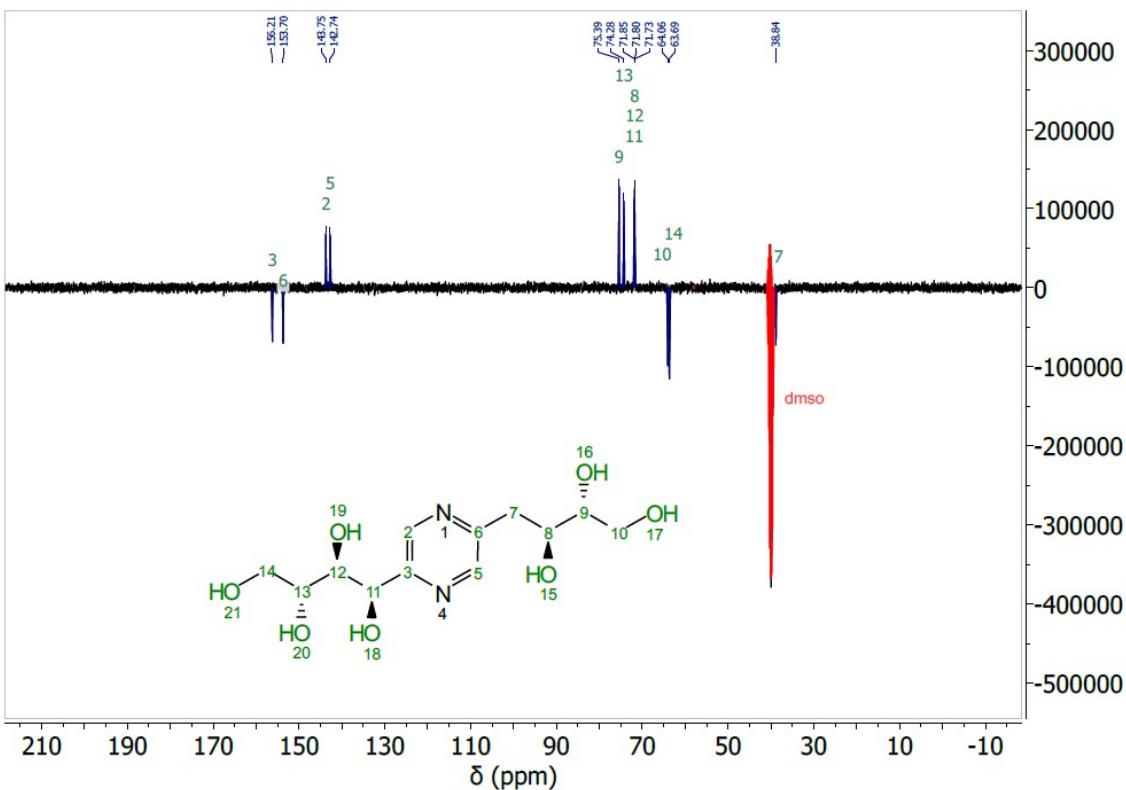

$^{13}\text{C}$ -APT-NMR (400MHz, DMSO- $d_6$ ) for 2,5-DOF from fructose

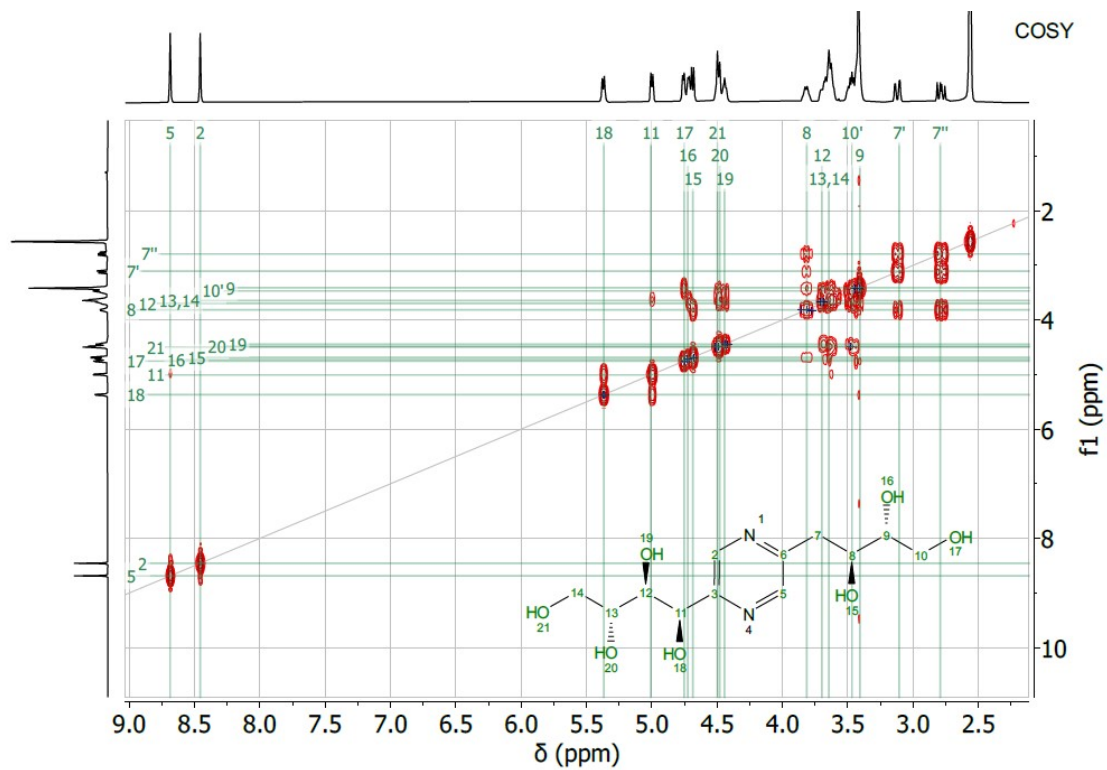

COSY -NMR (400MHz, DMSO-d<sub>6</sub>) for 2,5-DOF from fructose

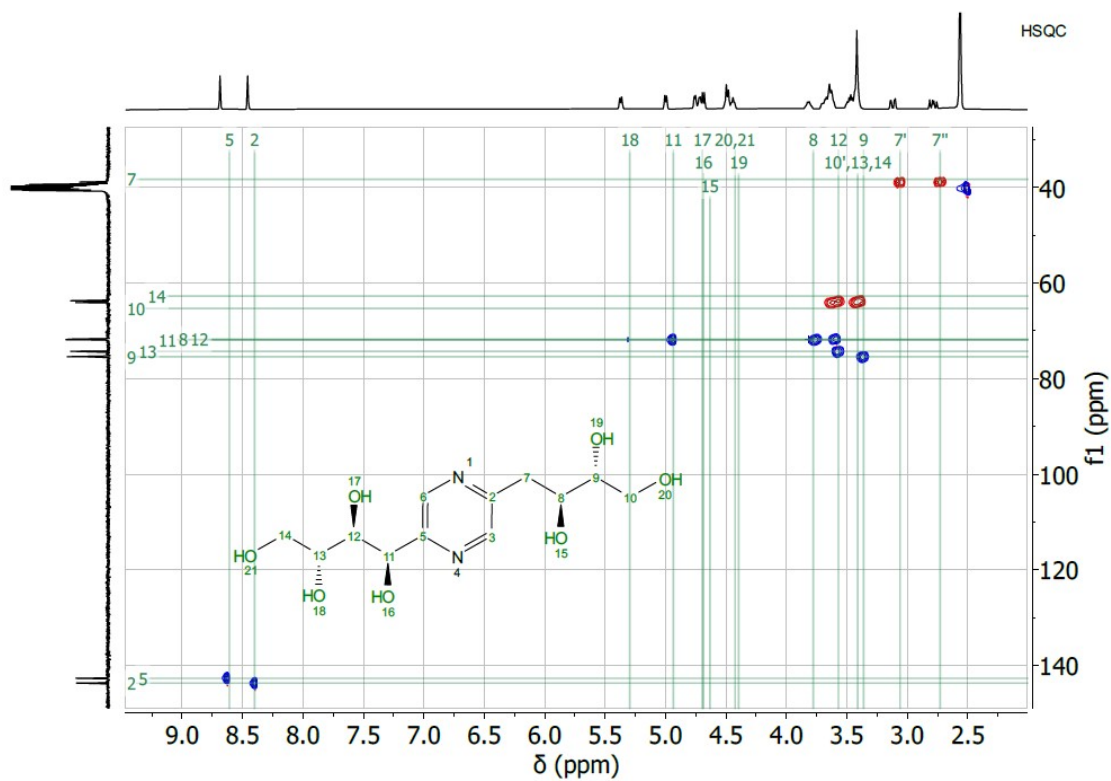

HSQC -NMR (400MHz, DMSO-d<sub>6</sub>) for 2,5-DOF from fructose

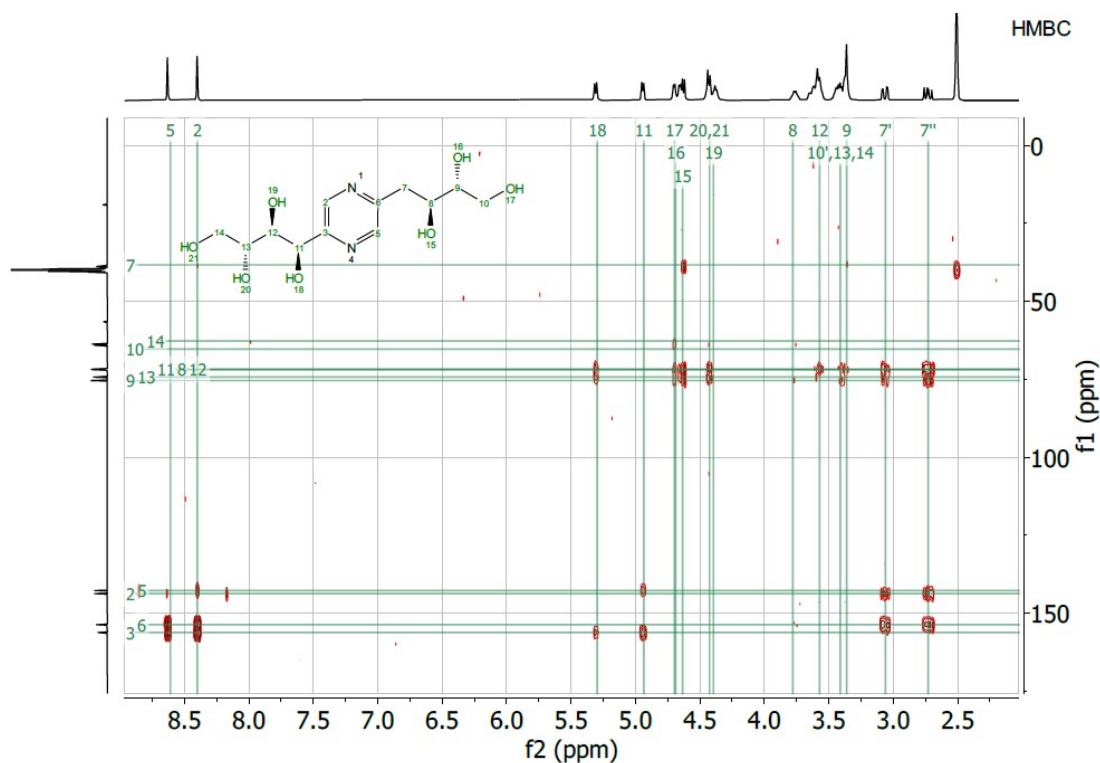

HMBC-NMR (400MHz, DMSO-d<sub>6</sub>) for 2,5-DOF from fructose

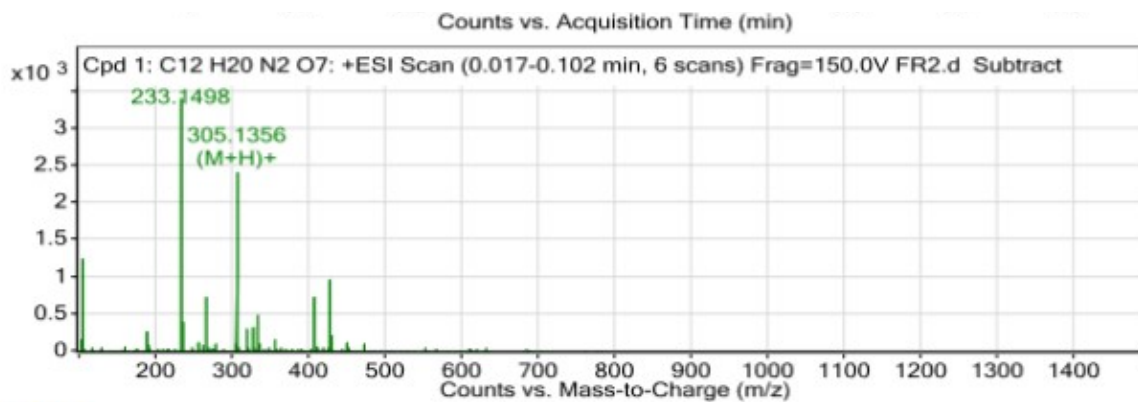

**Peak List**

| m/z      | z | Abund | Formula       | Ion    |
|----------|---|-------|---------------|--------|
| 233.1498 |   | 3426  |               |        |
| 233.3431 |   | 14    |               |        |
| 233.635  |   | 12    |               |        |
| 233.7796 |   | 8     |               |        |
| 234.1526 |   | 417   |               |        |
| 235.1552 |   | 54    |               |        |
| 305.1356 | 1 | 2455  | C12 H21 N2 O7 | (M+H)+ |
| 306.1377 | 1 | 381   | C12 H21 N2 O7 | (M+H)+ |
| 307.1458 | 1 | 57    | C12 H21 N2 O7 | (M+H)+ |

HR-MS for 2,5-DOF from fructose



### Analytical data for 2,6-DOF from glucose

$^1\text{H}$  NMR (400 MHz,  $\text{DMSO-}d_6$ )  $\delta$  =  $\square$  8.54 (s, 1H), 8.33 (s, 1H), 5.34 (d,  $J$  = 6.4 Hz, 1H), 4.94 (d,  $J$  = 4.3 Hz, 1H), 4.78 – 4.55 (m, 3H), 4.53 – 4.32 (m, 3H), 3.75 (dt,  $J$  = 6.5, 3.3, 3.3 Hz, 1H), 3.68 – 3.54 (m, 5H), 3.06 (dd,  $J$  = 13.8, 2.7 Hz, 1H), 2.71 (dd,  $J$  = 13.9, 9.9 Hz, 1H) ppm.

$^{13}\text{C}$  NMR (101 MHz,  $\text{DMSO-}d_6$ )  $\delta$  =  $\square$  22.56, 63.24, 63.62, 71.25, 71.36, 71.59, 73.79, 75.07, 140.59, 142.93, 153.97, 157.90 ppm.

HRMS (ESI<sup>+</sup>): Calculated for  $\text{C}_{12}\text{H}_{21}\text{N}_2\text{O}_7$ : 305.1343, Found: 305.1350

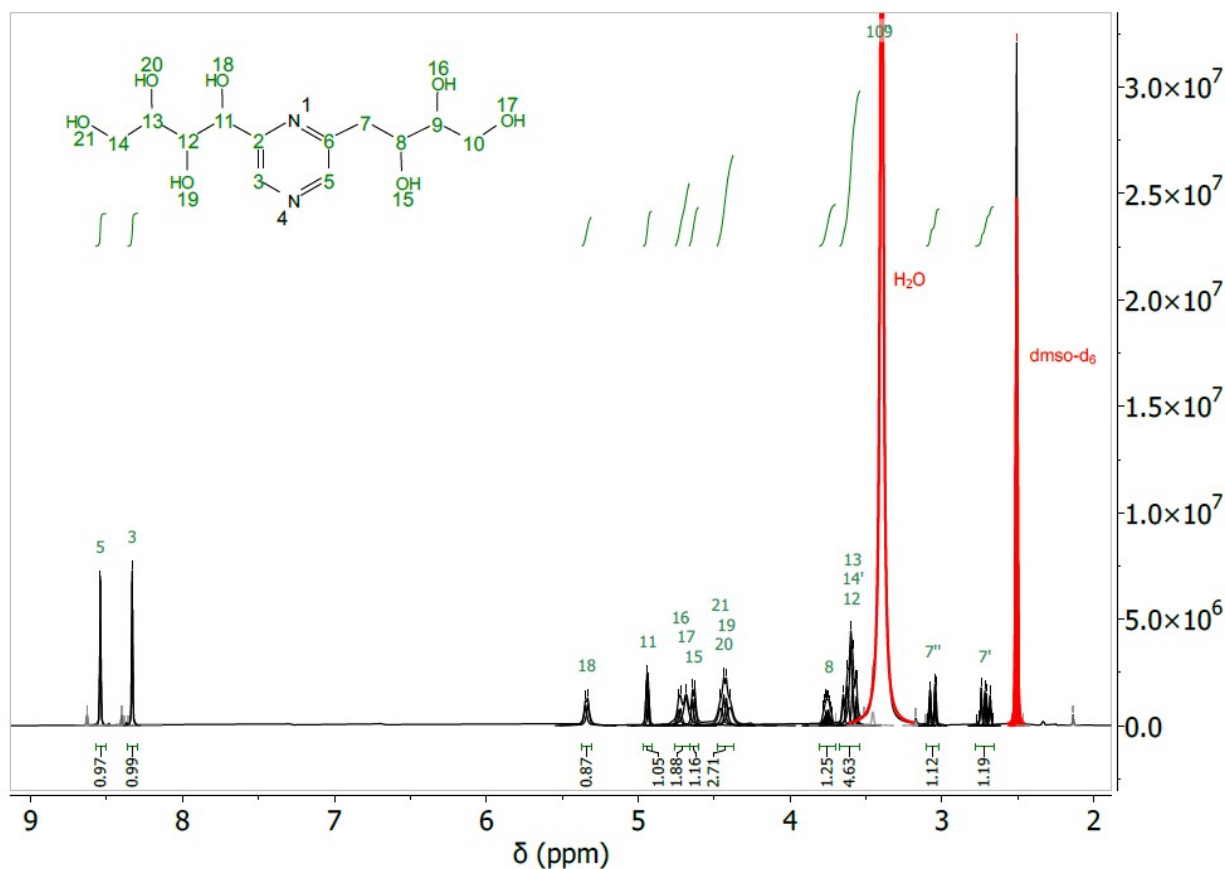

$^1\text{H}$  -NMR (400MHz,  $\text{DMSO-}d_6$ ) for 2,6-DOF from glucose. The integration misses the proton peaks from 9 and 10. These are hidden behind the water peak as shown by HSQC spectra.

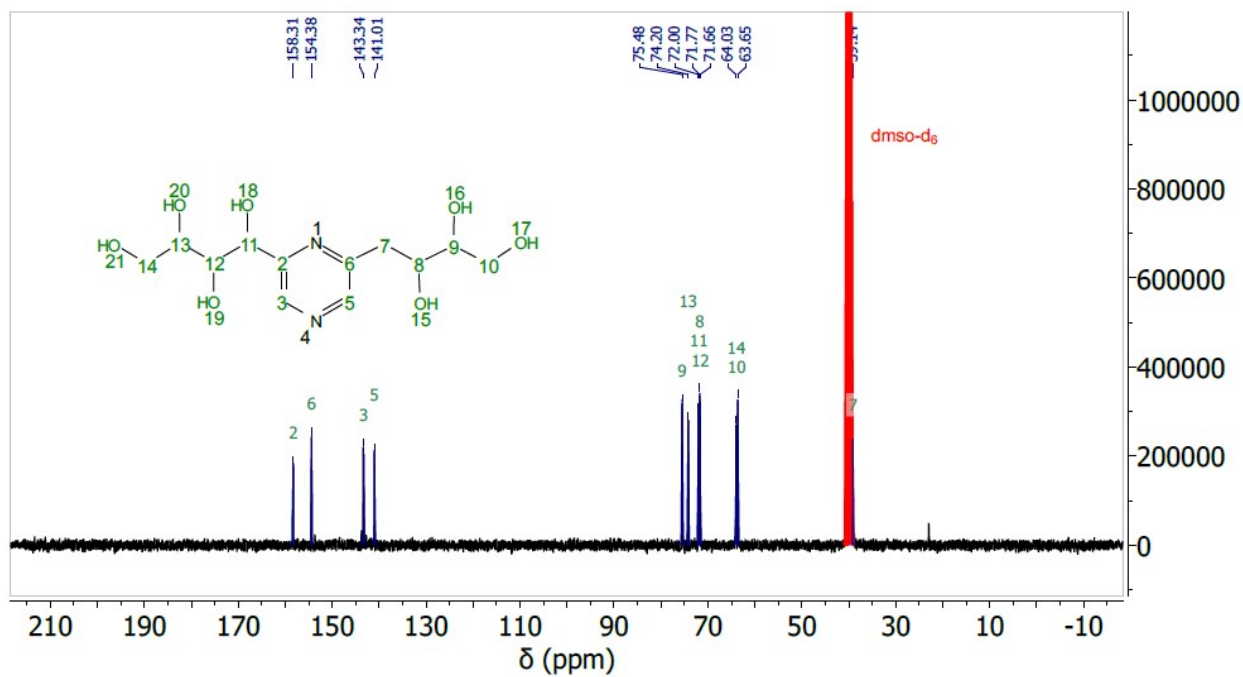

$^{13}\text{C}$ -NMR (400MHz,  $\text{DMSO-d}_6$ ) for 2,6-DOF from glucose

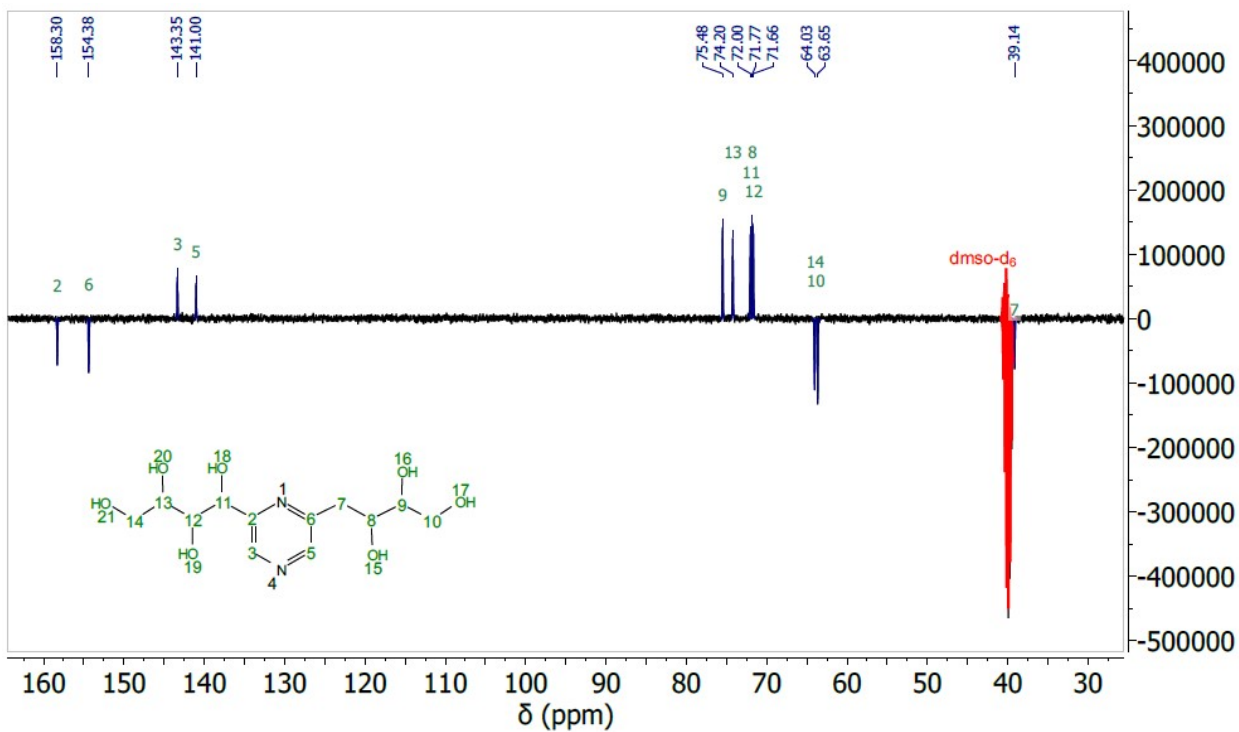

$^{13}\text{C}$ -APT-NMR (400MHz,  $\text{DMSO-d}_6$ ) for 2,6-DOF from glucose

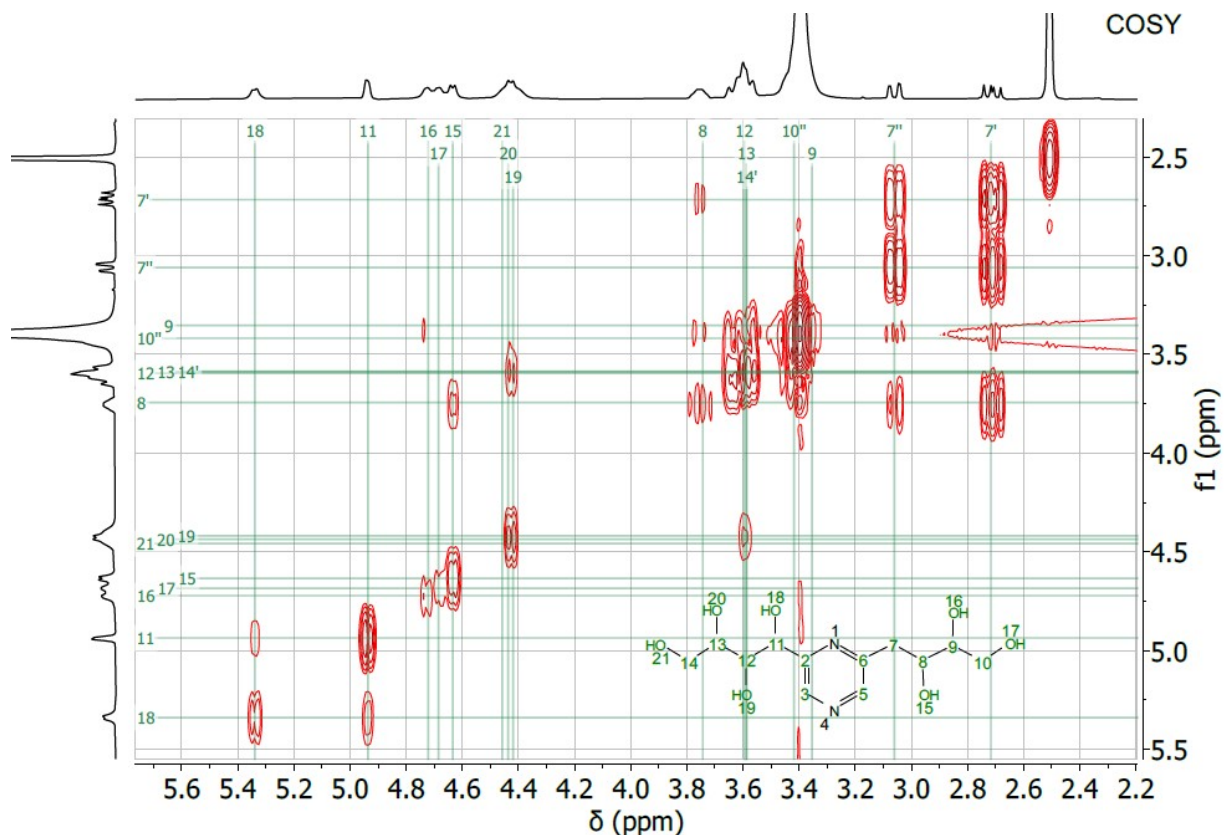

COSY-NMR (400MHz, DMSO- $d_6$ ) for 2,6-DOF from glucose

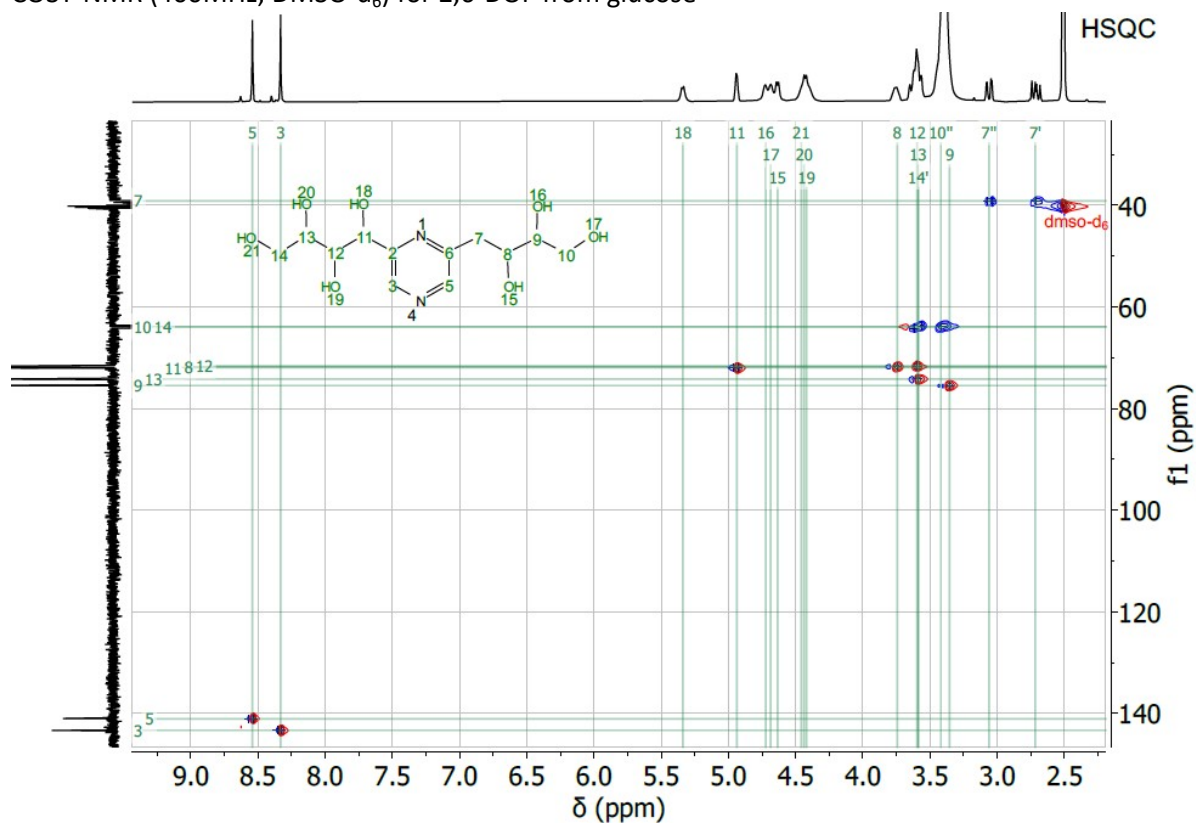

HSQC-NMR (400MHz, DMSO- $d_6$ ) for 2,6-DOF from glucose

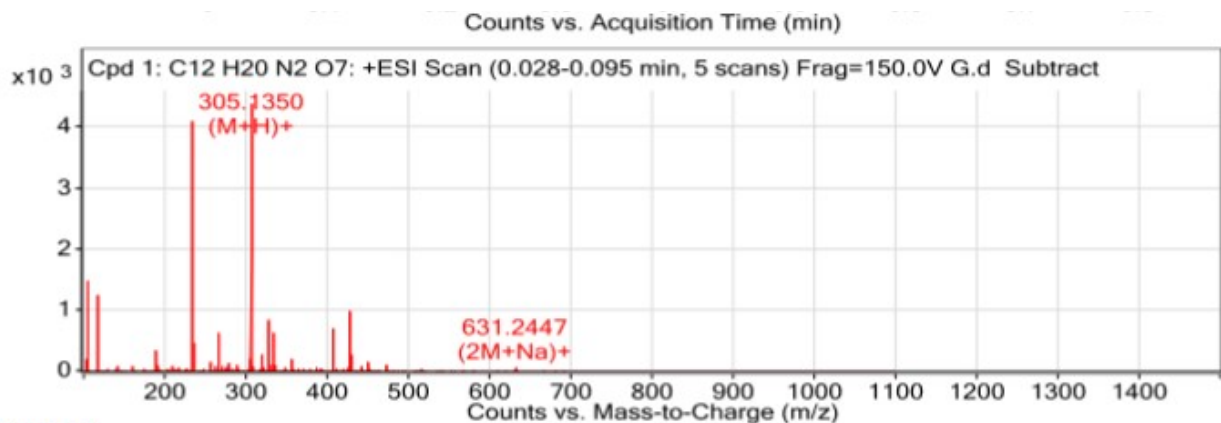

**Peak List**

| <i>m/z</i> | <i>z</i> | Abund | Formula                                                           | Ion                  |
|------------|----------|-------|-------------------------------------------------------------------|----------------------|
| 302.2089   |          | 39    |                                                                   |                      |
| 304.1678   |          | 25    |                                                                   |                      |
| 305.135    |          | 4450  | C <sub>12</sub> H <sub>21</sub> N <sub>2</sub> O <sub>7</sub>     | (M+H) <sup>+</sup>   |
| 306.1388   |          | 591   | C <sub>12</sub> H <sub>21</sub> N <sub>2</sub> O <sub>7</sub>     | (M+H) <sup>+</sup>   |
| 307.1347   |          | 104   | C <sub>12</sub> H <sub>21</sub> N <sub>2</sub> O <sub>7</sub>     | (M+H) <sup>+</sup>   |
| 327.1176   | 1        | 869   | C <sub>12</sub> H <sub>20</sub> N <sub>2</sub> Na O <sub>7</sub>  | (M+Na) <sup>+</sup>  |
| 328.1261   | 1        | 121   | C <sub>12</sub> H <sub>20</sub> N <sub>2</sub> Na O <sub>7</sub>  | (M+Na) <sup>+</sup>  |
| 329.1256   | 1        | 27    | C <sub>12</sub> H <sub>20</sub> N <sub>2</sub> Na O <sub>7</sub>  | (M+Na) <sup>+</sup>  |
| 631.2447   | 1        | 75    | C <sub>24</sub> H <sub>40</sub> N <sub>4</sub> Na O <sub>14</sub> | (2M+Na) <sup>+</sup> |
| 632.2437   | 1        | 23    | C <sub>24</sub> H <sub>40</sub> N <sub>4</sub> Na O <sub>14</sub> | (2M+Na) <sup>+</sup> |

HR-MS for 2,6-DOF from glucose

### Analytical data for 2,6-DOFu from fucose

$^1\text{H}$  NMR (500 MHz,  $\text{DMSO-d}_6$ )  $\delta$  = 8.45 (s, 1H), 8.38 (s, 1H), 5.48 (d,  $J$  = 5.7 Hz, 1H), 4.59 (dd,  $J$  = 7.5, 5.6 Hz, 1H), 4.54 (dd,  $J$  = 5.5, 3.5 Hz, 2H), 4.41 (d,  $J$  = 6.9 Hz, 1H), 4.29 (d,  $J$  = 6.1 Hz, 1H), 3.87-3.81 (m, 1H), 3.73 – 3.64 (m, 1H), 3.59-3.56 (m, 1H), 3.47 (td,  $J$  = 7.2, 3.0 Hz, 1H), 2.88 (dd,  $J$  = 13.8, 3.3 Hz, 1H), 2.73 (dd,  $J$  = 13.8, 9.5 Hz, 1H), 1.10 (d,  $J$  = 6.5 Hz, 3H) 1.08 (d,  $J$  = 6.3 Hz, 3H).

$^{13}\text{C}$  NMR (101 MHz,  $\text{DMSO-d}_6$ )  $\delta$  = 18.58, 20.09, 37.81, 65.49, 69.04, 72.76, 73.97, 76.66, 141.31, 143.31, 154.09, 156.97ppm.

MS (ESI<sup>+</sup>): Calculated for  $\text{C}_{12}\text{H}_{21}\text{N}_2\text{O}_5$ : 273.1445, Found: 273.1450

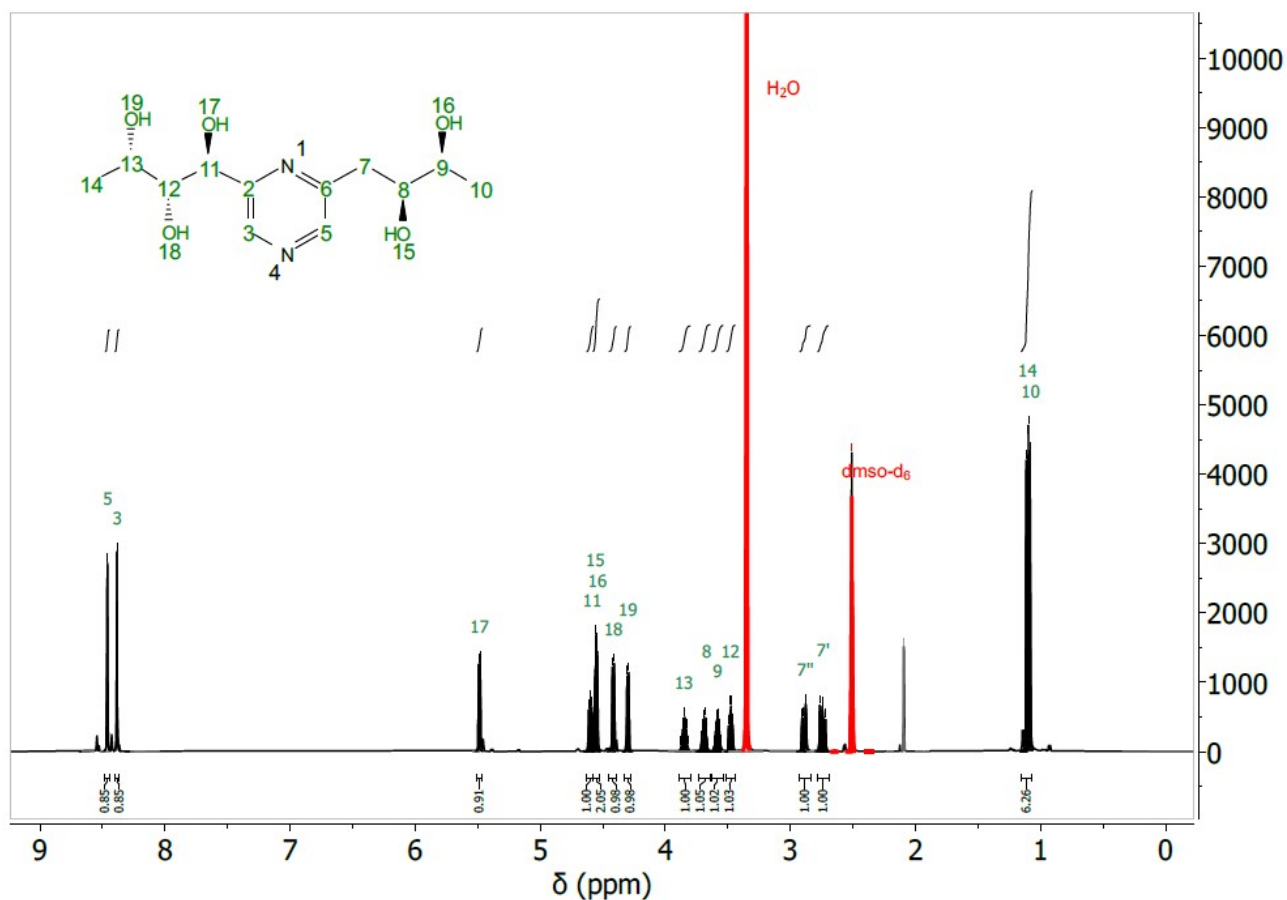

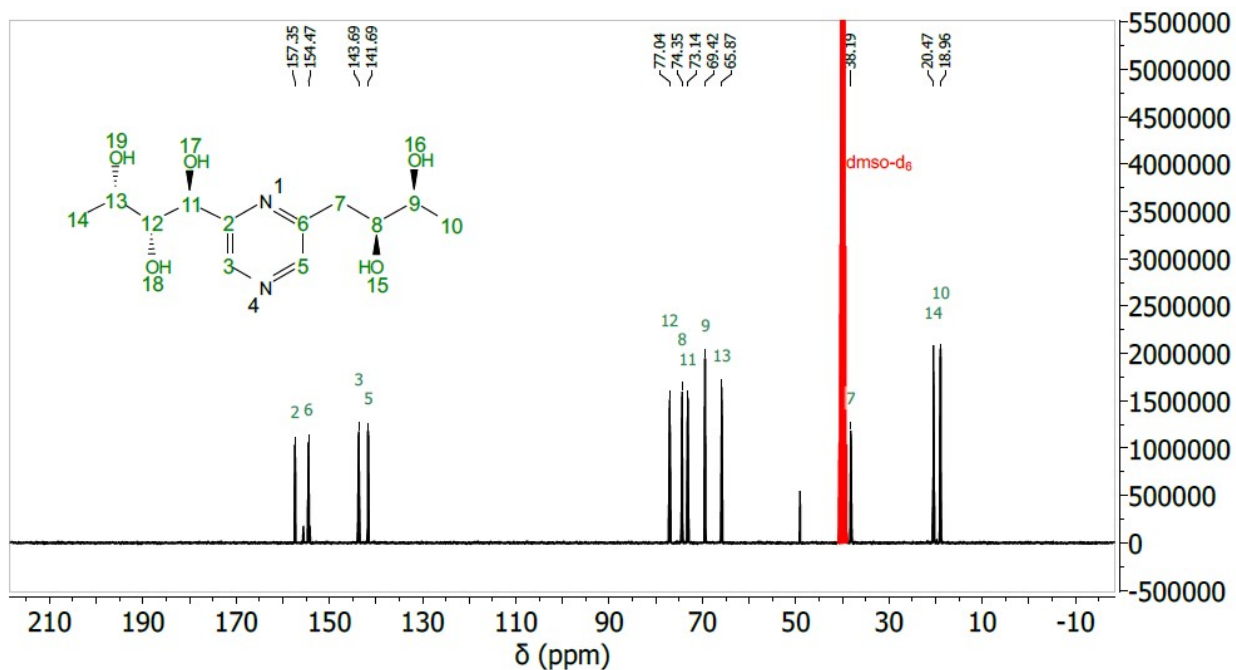

<sup>13</sup>C-NMR (400MHz, DMSO-d<sub>6</sub>) for 2,6-DOFu from fucose

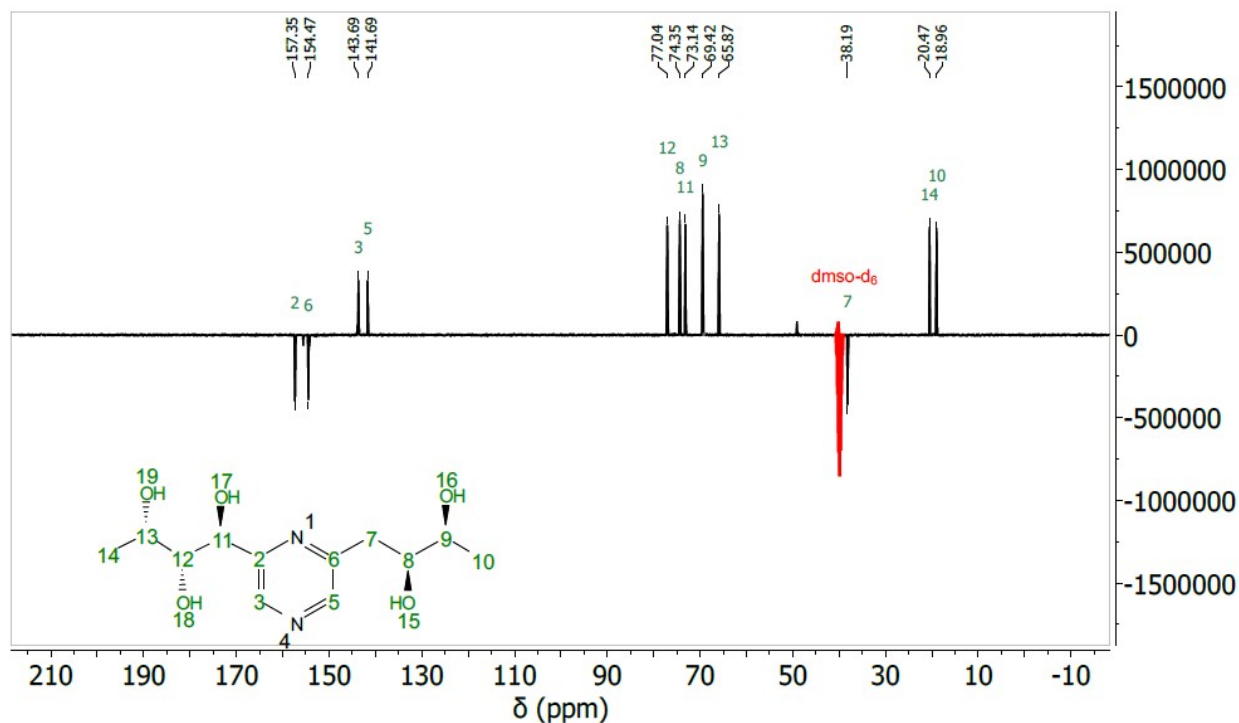

<sup>13</sup>C-APT-NMR (400MHz, DMSO-d<sub>6</sub>) for 2,6-DOFu from fucose

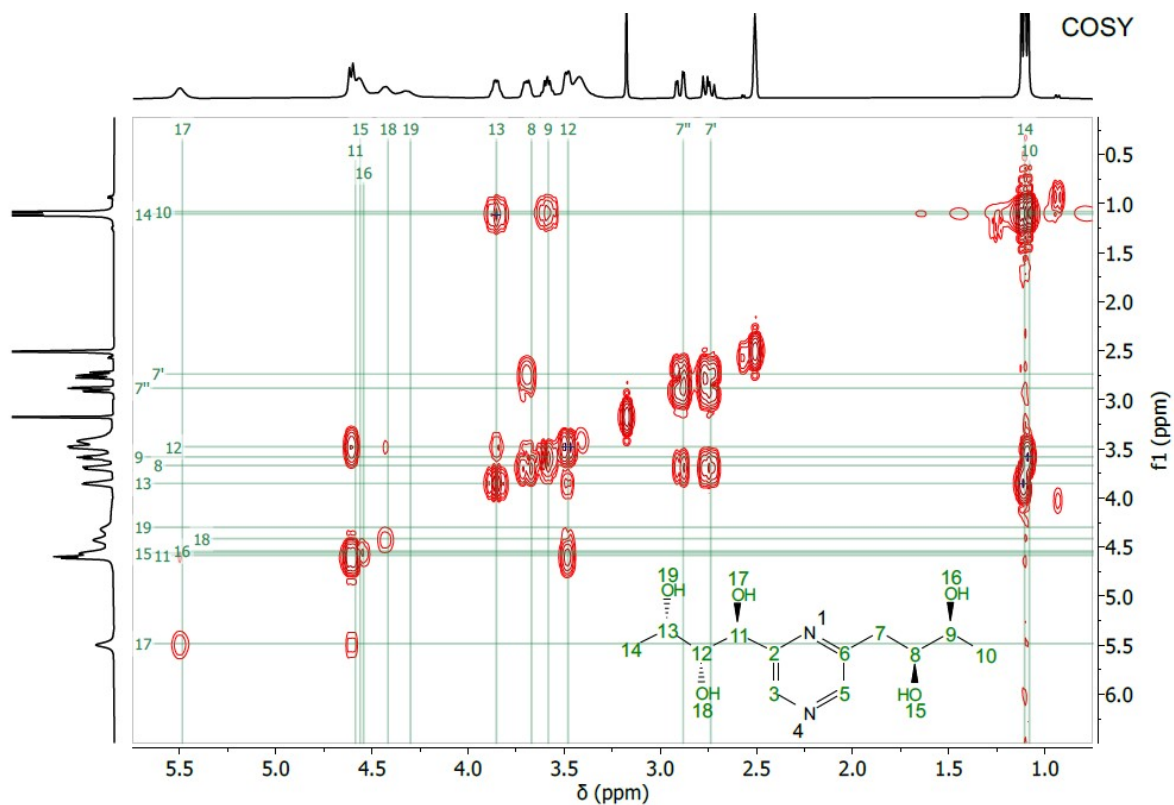

COSY-NMR (400MHz, DMSO-d<sub>6</sub>) for 2,6-DOFu from fucose

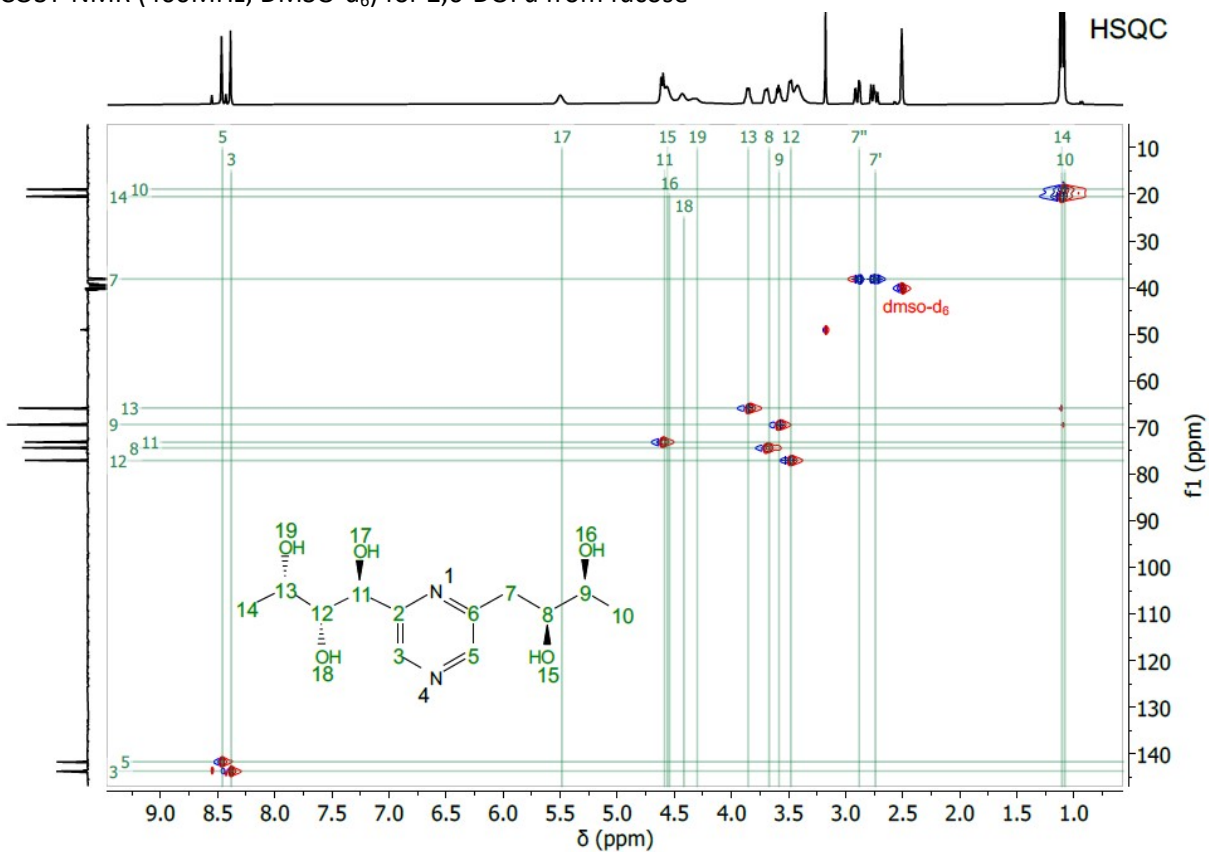

HSQC-NMR (400MHz, DMSO-d<sub>6</sub>) for 2,6-DOFu from fucose

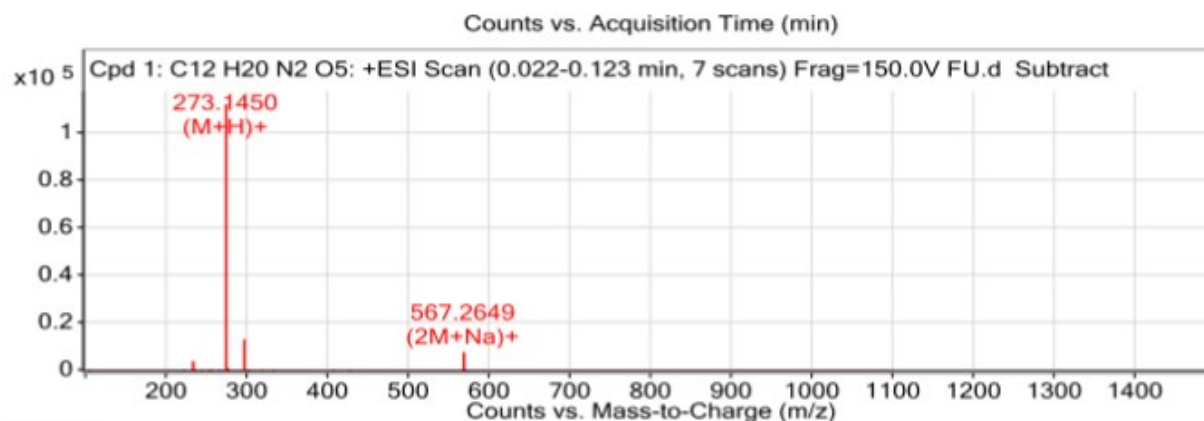

Peak List

| m/z      | z | Abund  | Formula                                                           | Ion                         |
|----------|---|--------|-------------------------------------------------------------------|-----------------------------|
| 255.1345 | 1 | 325    | C <sub>12</sub> H <sub>19</sub> N <sub>2</sub> O <sub>4</sub>     | (M+H)+[-H <sub>2</sub> O]   |
| 273.145  |   | 114665 | C <sub>12</sub> H <sub>21</sub> N <sub>2</sub> O <sub>5</sub>     | (M+H)+                      |
| 273.3488 |   | 2166   |                                                                   |                             |
| 274.1479 |   | 11320  | C <sub>12</sub> H <sub>21</sub> N <sub>2</sub> O <sub>5</sub>     | (M+H)+                      |
| 275.15   |   | 1459   | C <sub>12</sub> H <sub>21</sub> N <sub>2</sub> O <sub>5</sub>     | (M+H)+                      |
| 295.1274 | 1 | 13940  | C <sub>12</sub> H <sub>20</sub> N <sub>2</sub> Na O <sub>5</sub>  | (M+Na)+                     |
| 296.1309 | 1 | 1815   | C <sub>12</sub> H <sub>20</sub> N <sub>2</sub> Na O <sub>5</sub>  | (M+Na)+                     |
| 549.2513 | 1 | 79     | C <sub>24</sub> H <sub>38</sub> N <sub>4</sub> Na O <sub>9</sub>  | (2M+Na)+[-H <sub>2</sub> O] |
| 567.2649 | 1 | 8131   | C <sub>24</sub> H <sub>40</sub> N <sub>4</sub> Na O <sub>10</sub> | (2M+Na)+                    |
| 568.2676 | 1 | 1988   | C <sub>24</sub> H <sub>40</sub> N <sub>4</sub> Na O <sub>10</sub> | (2M+Na)+                    |

HR-MS for 2,6-DOFu from fucose

References

1. Wong Weng R, Oliver Allen G, Linington Roger G. Development of Antibiotic Activity Profile Screening for the Classification and Discovery of Natural Product Antibiotics. *Chemistry & Biology*. 2012;19(11):1483-95.
2. Hawkins PM, Hoi DM, Cheung C-Y, Wang T, Quan D, Sasi VM, et al. Potent Bactericidal Antimycobacterials Targeting the Chaperone ClpC1 Based on the Depsipeptide Natural Products Ecumicin and Ohmyungsamycin A. *Journal of Medicinal Chemistry*. 2022;65(6):4893-908.
